# Supplementary material for: First-Step Mutations during Adaptation Restore the Expression of Hundreds of Genes
Source: PubMed Central journal article supplement — Mol Biol Evol. 2015 Oct 24;33(1):25–39. doi: 10.1093/molbev/msv228 (PMC4693981; doi:10.1093/molbev/msv228), 2015-10-24
Supplement: supp_msv228_SupplementaryFigures_2.pdf [file supp_msv228_SupplementaryFigures_2.pdf]

# Growth curves ancestor at 42°C

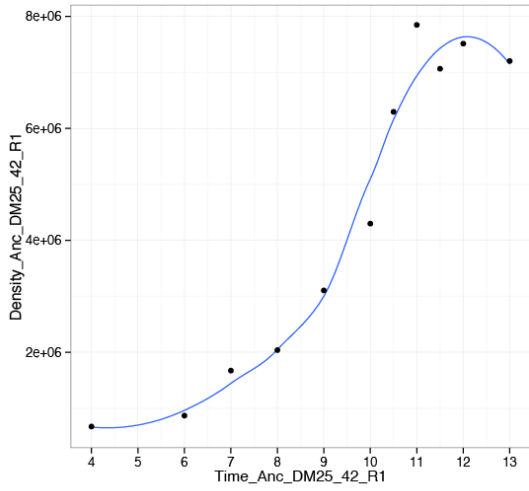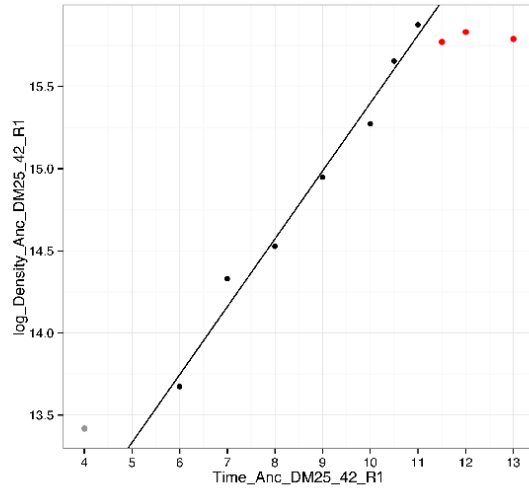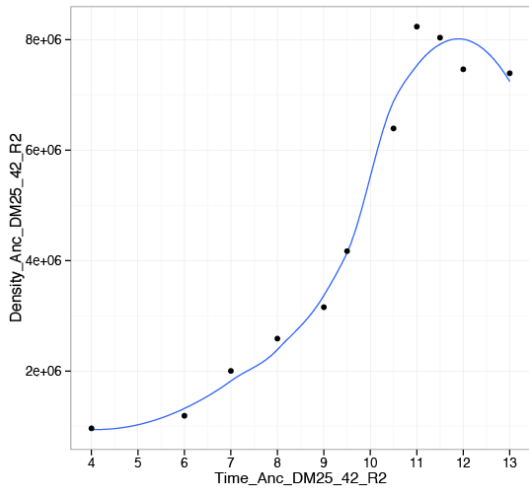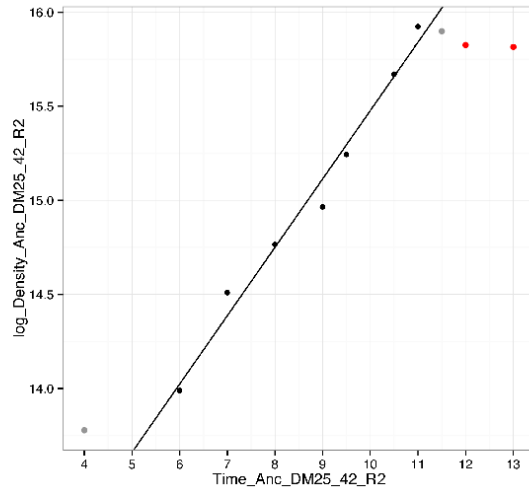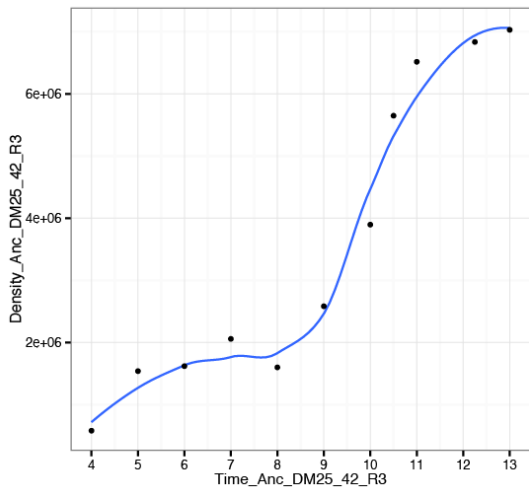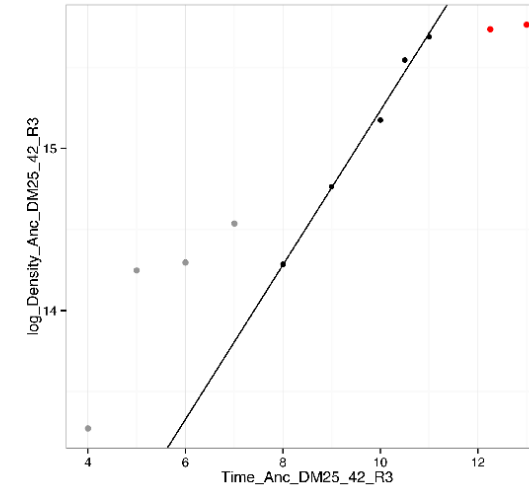

# Growth curves *I572F* at 42°C

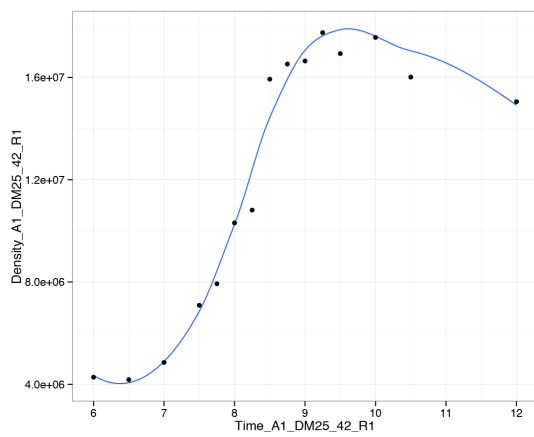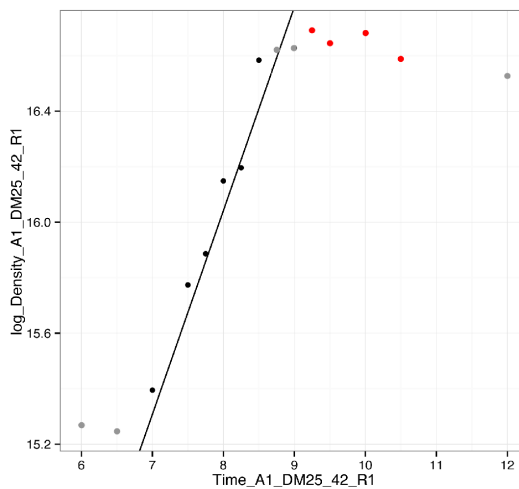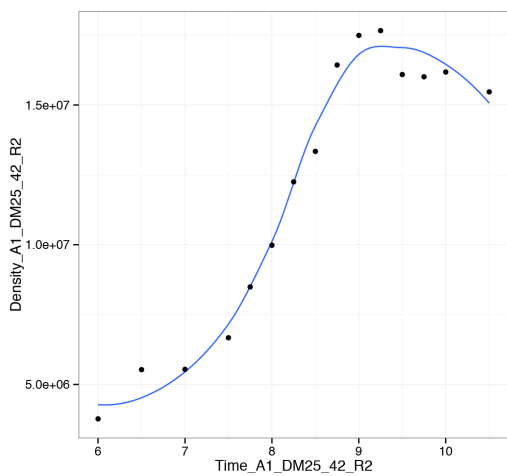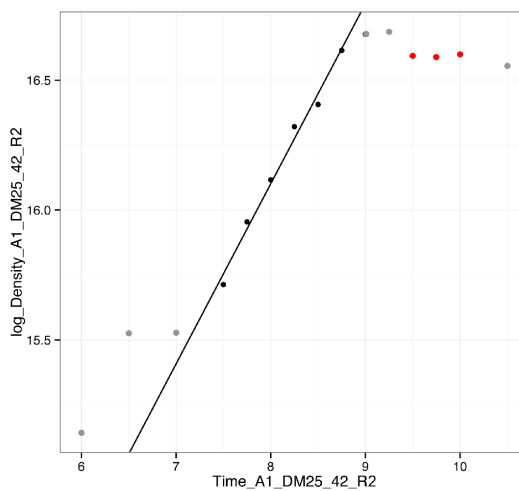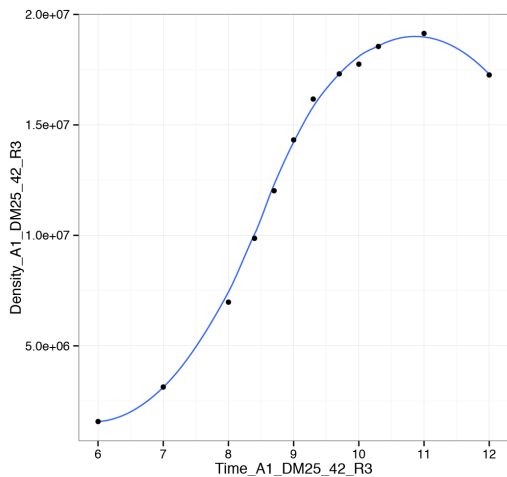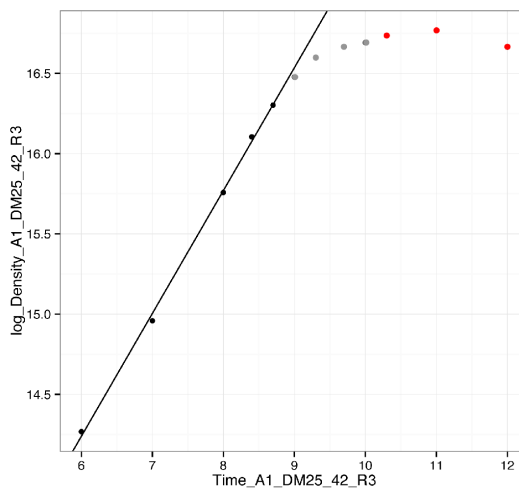

# Growth curves *I572L* at 42°C

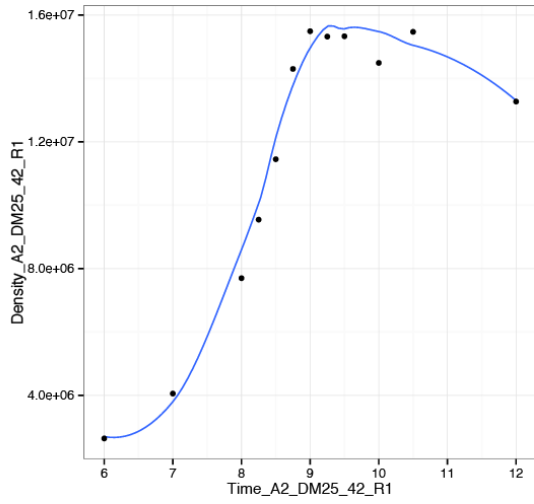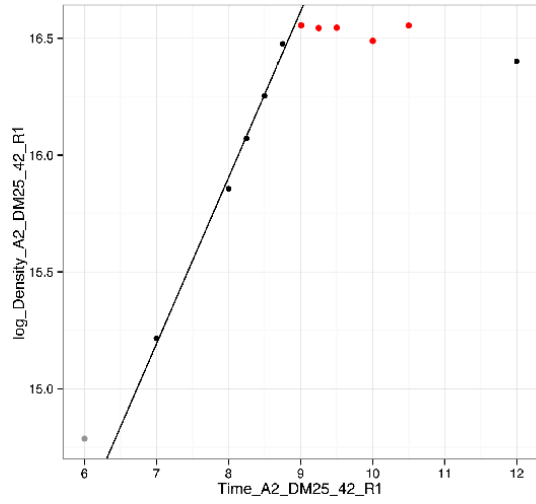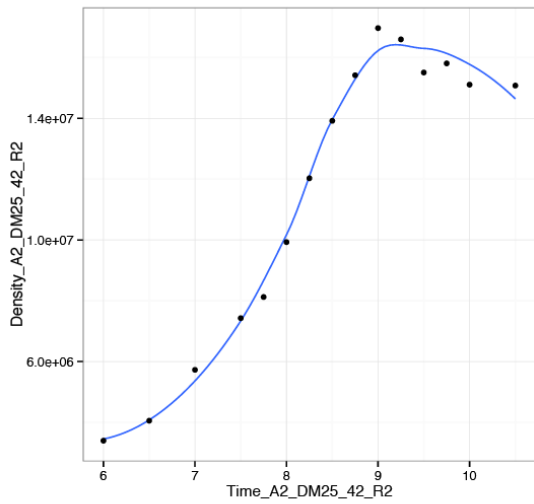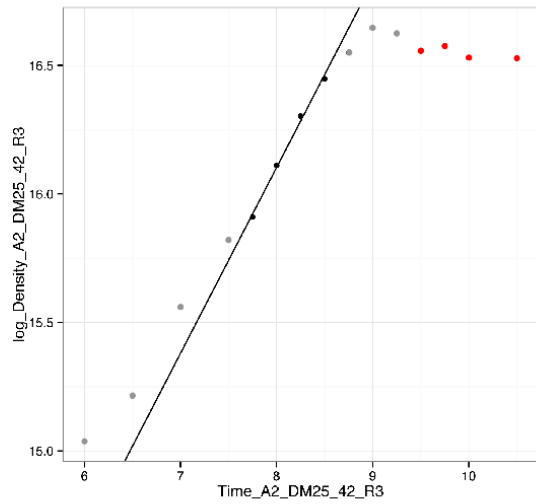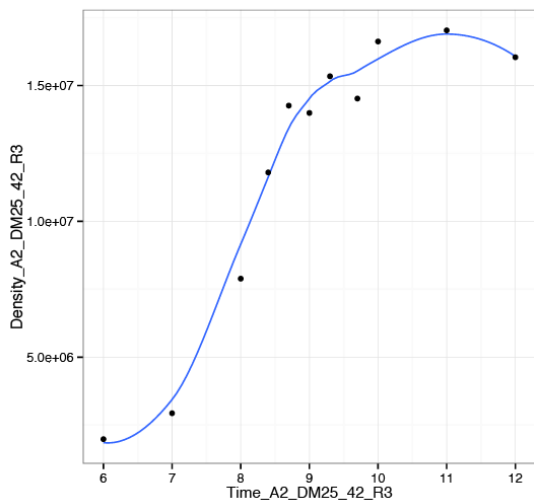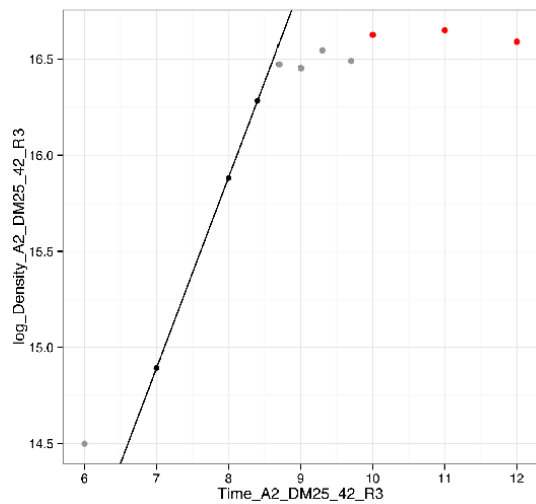

# Growth curves *I572N* at 42°C

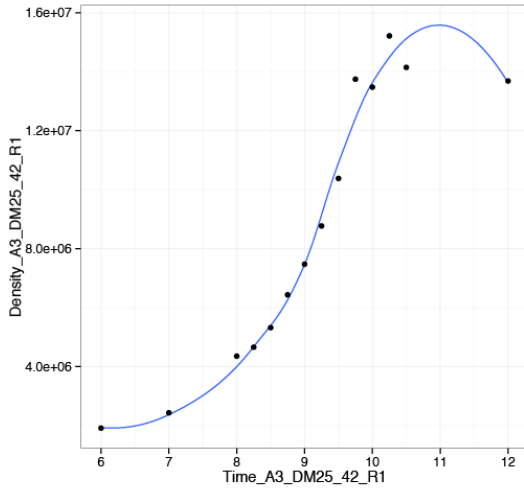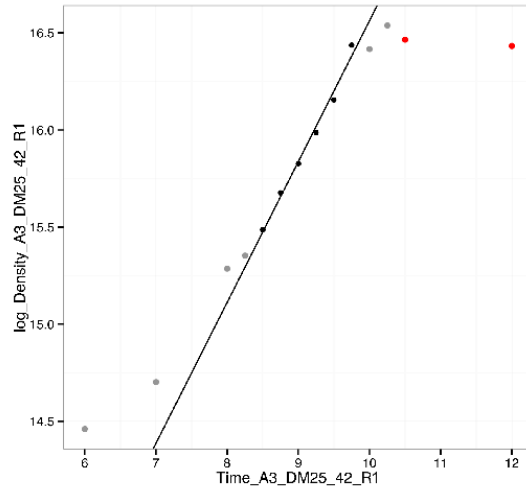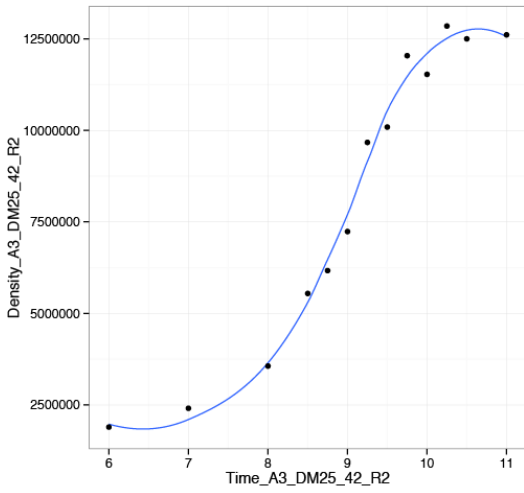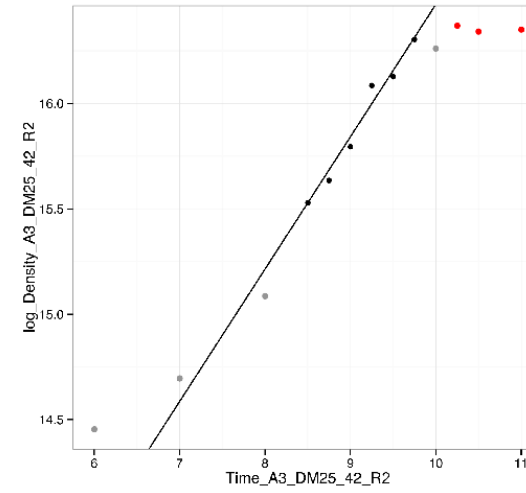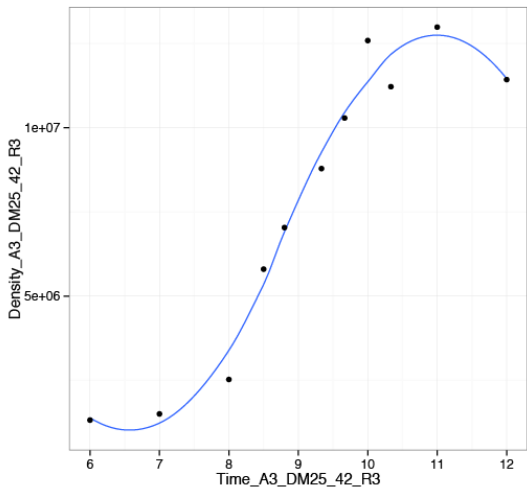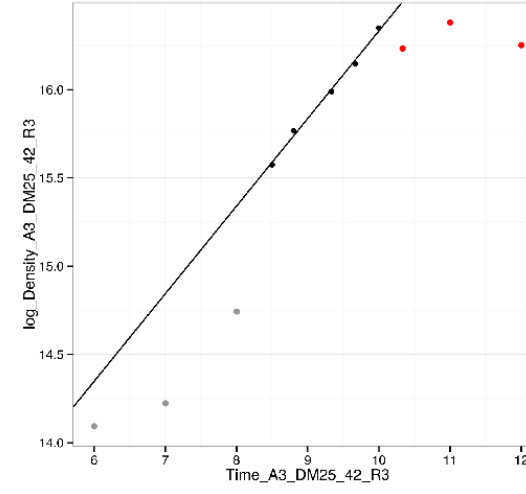

# Growth curves clone 27 at 42°C

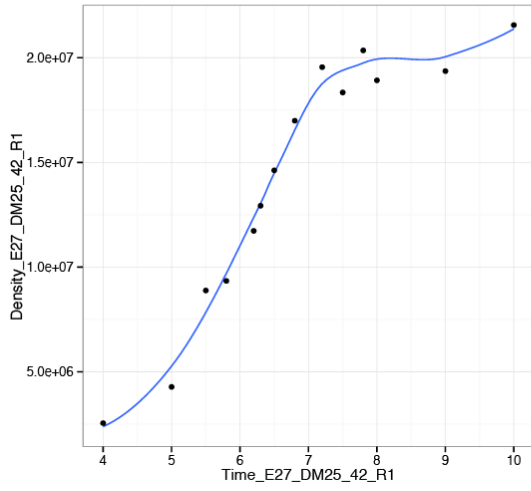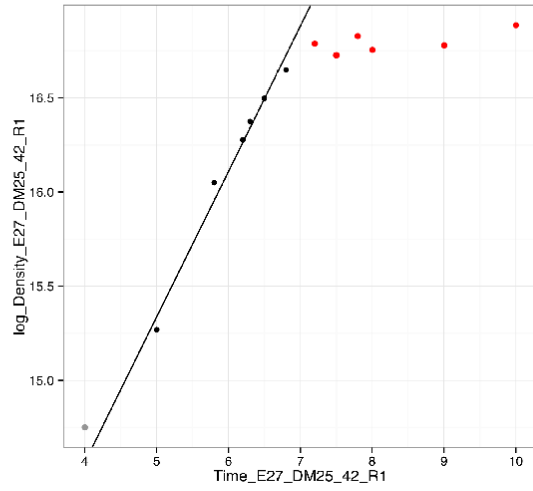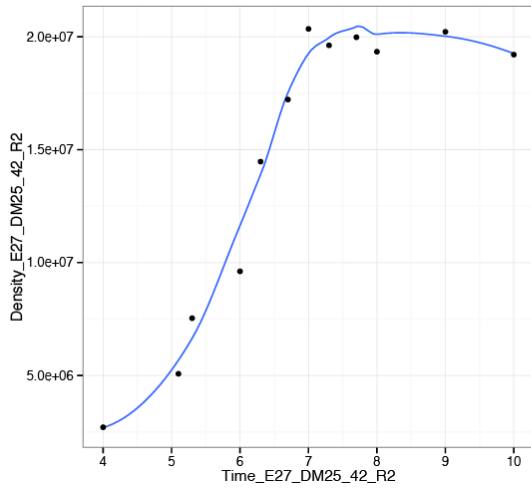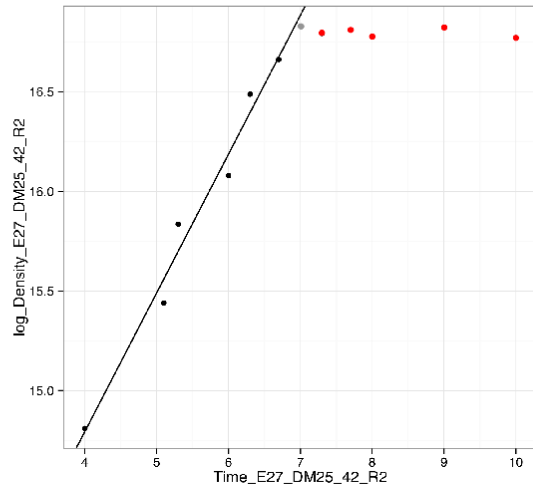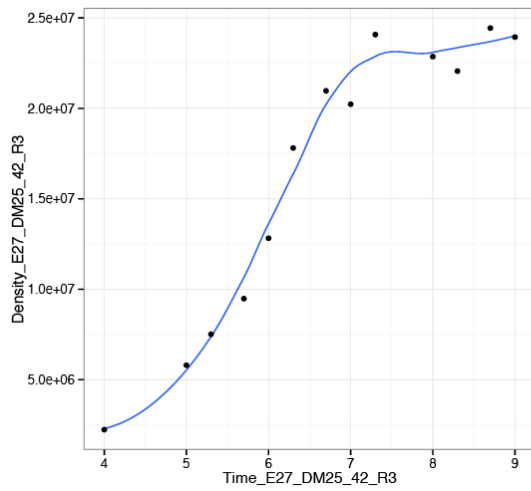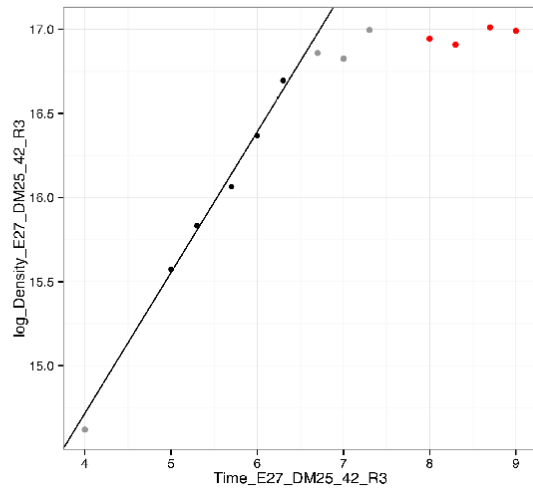

# Growth curves clone 97 at 42°C

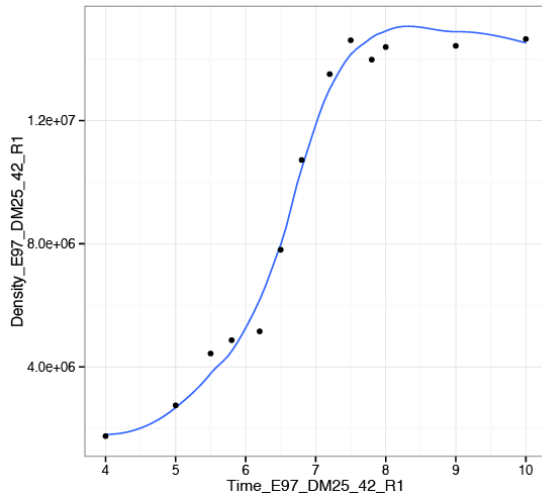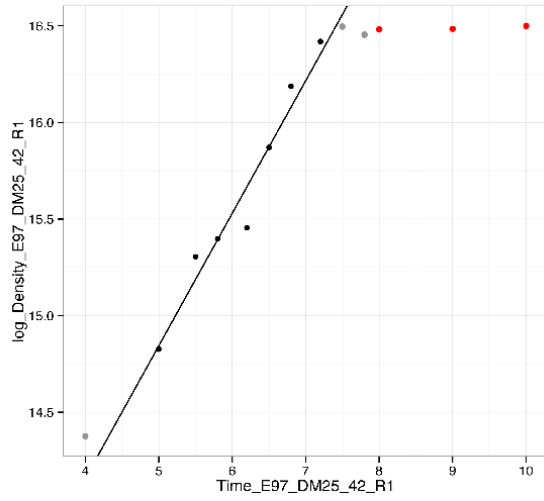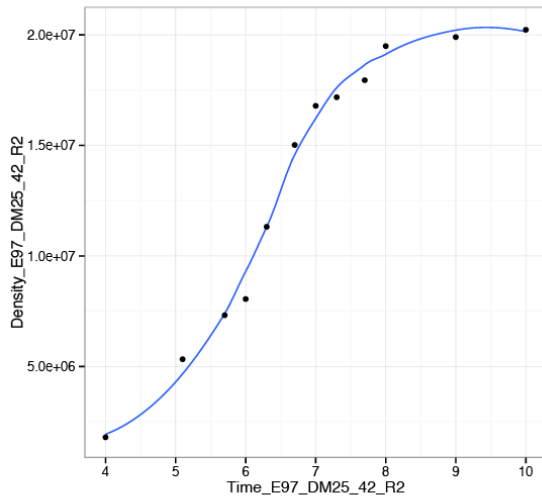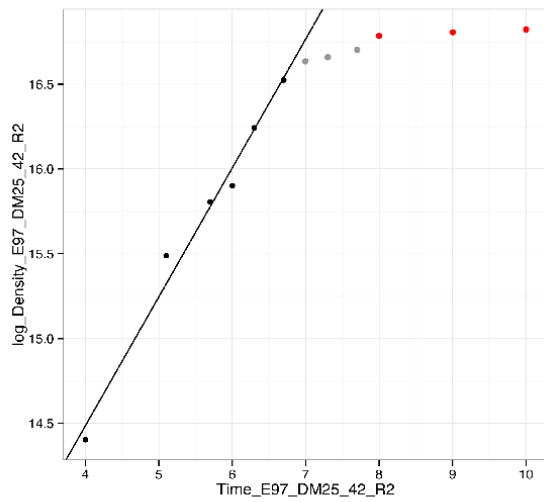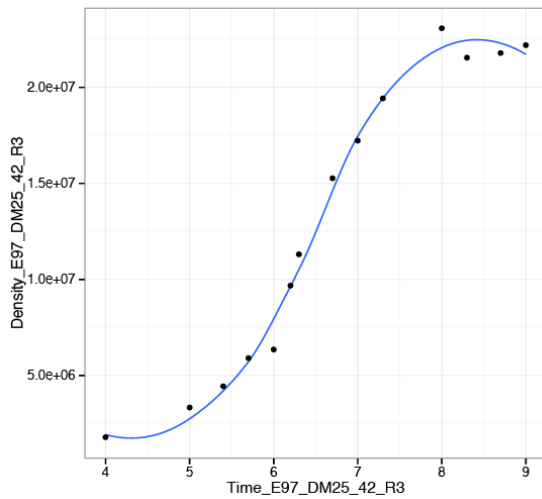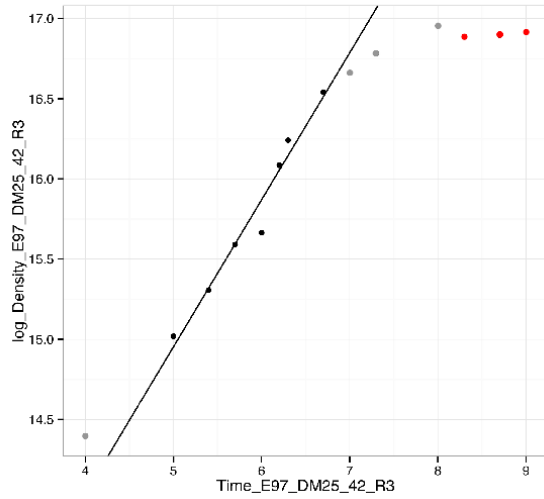

# Growth curves ancestor at 37°C

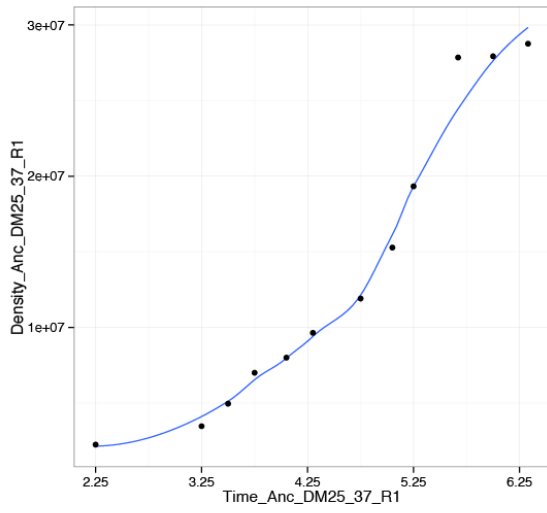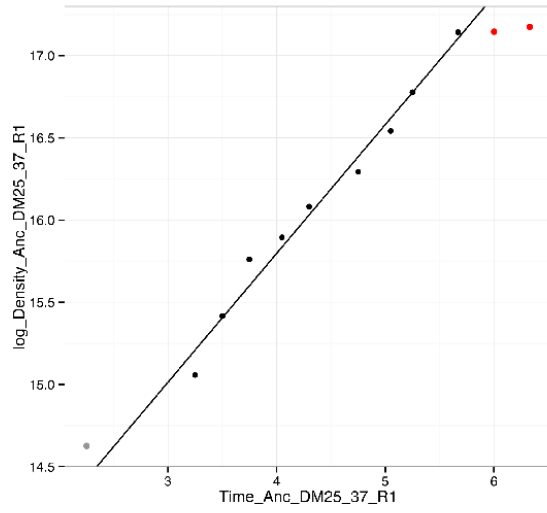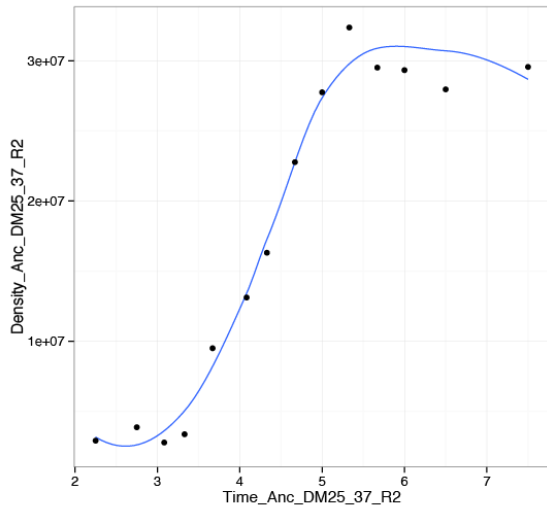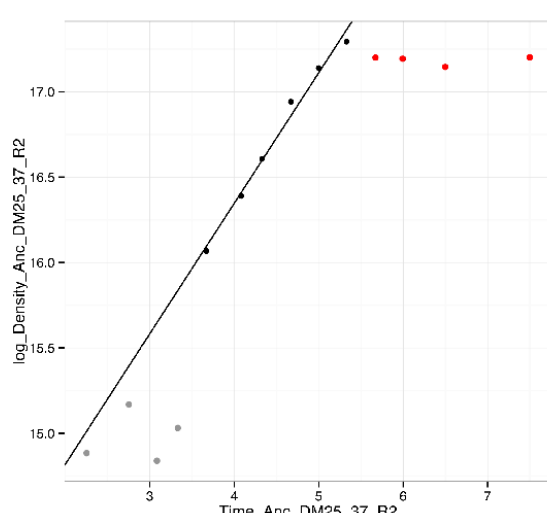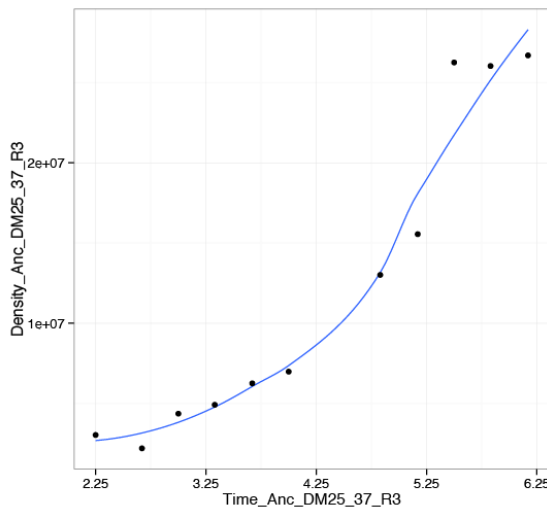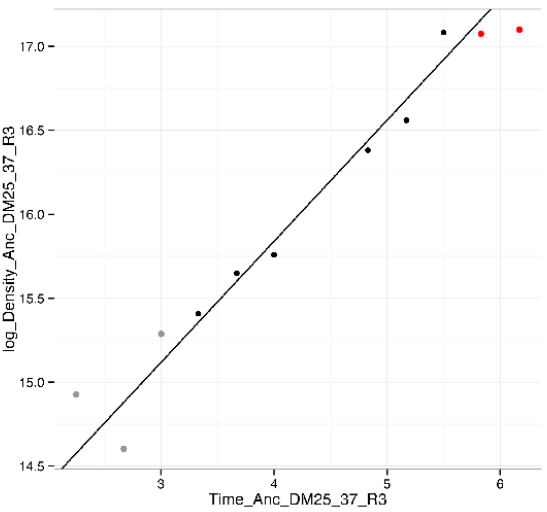

# Growth curves *I572F* at 37°C

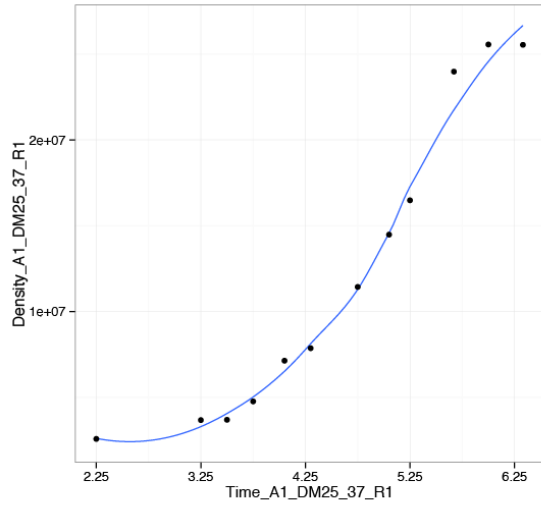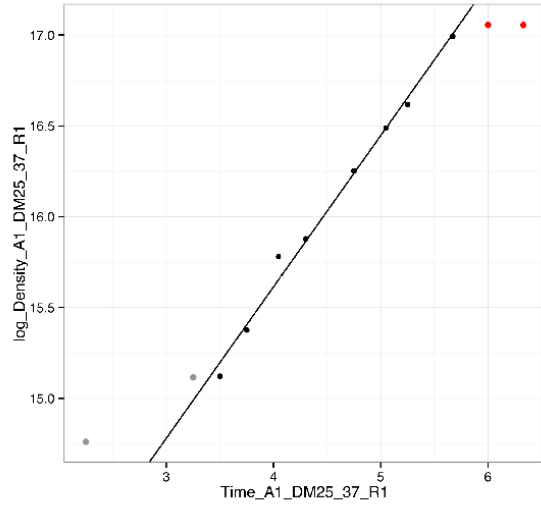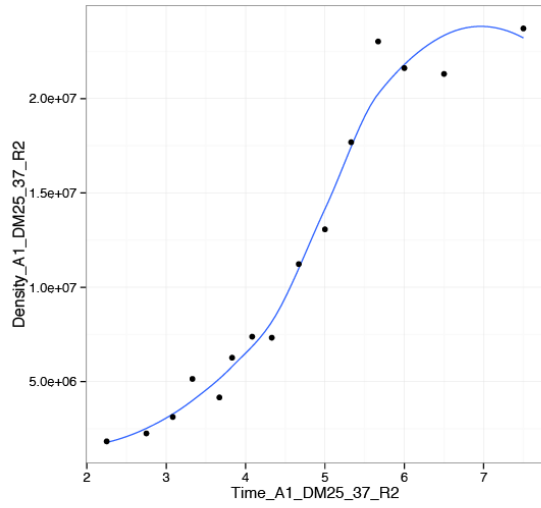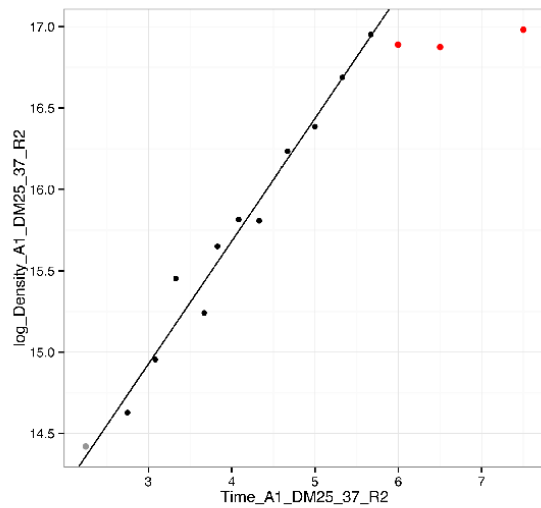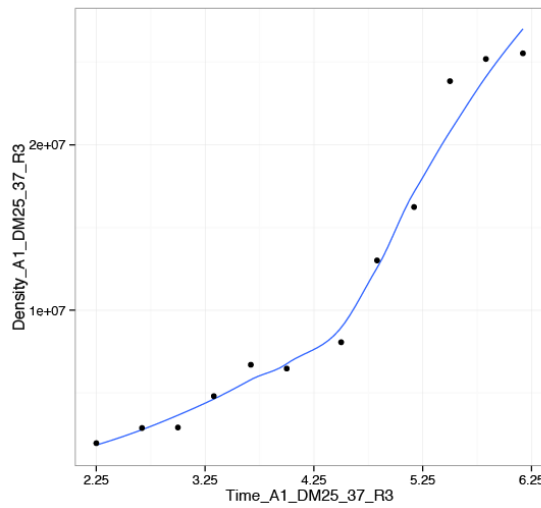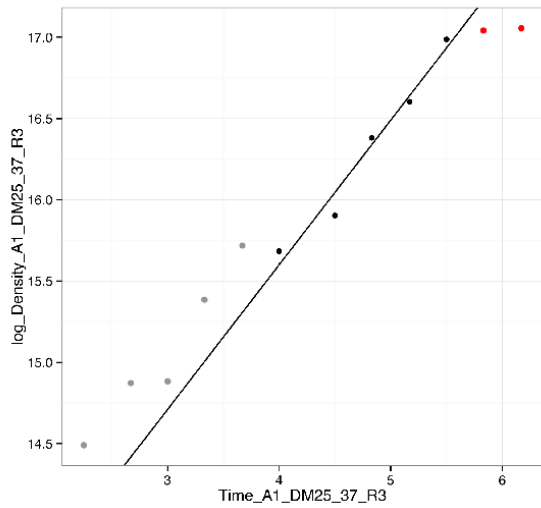



# Growth curves *I572L* at 37°C

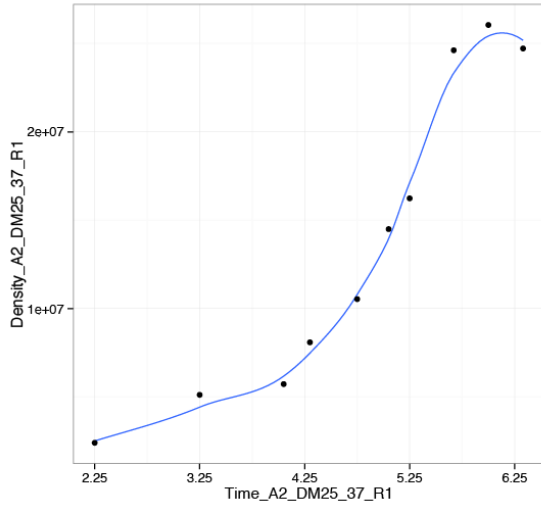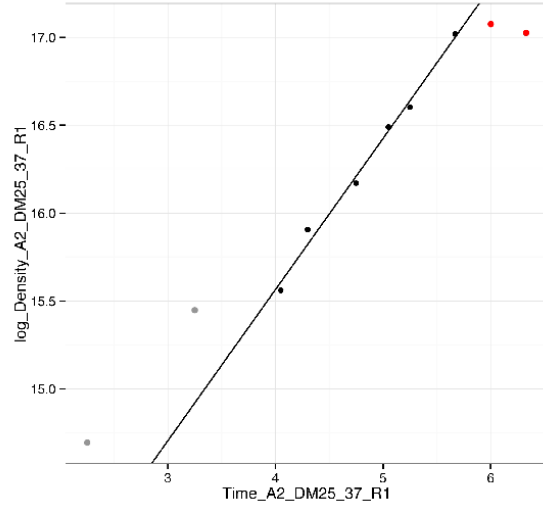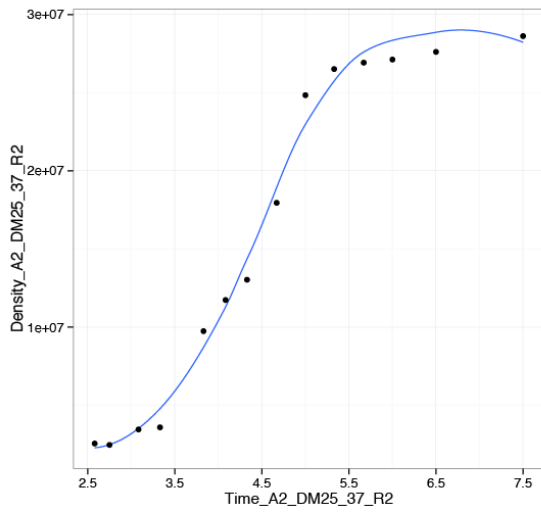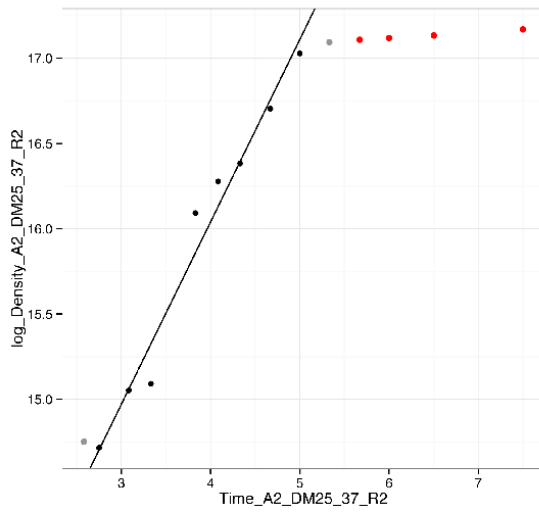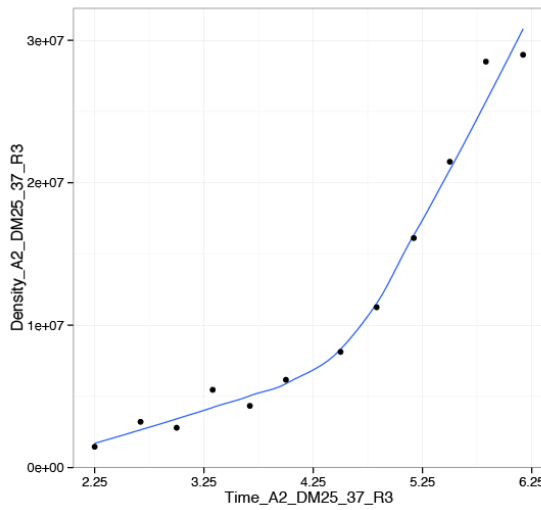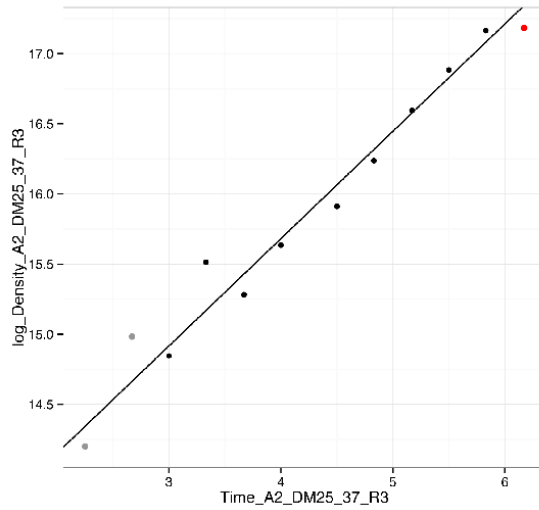

# Growth curves *I572N* at 37°C

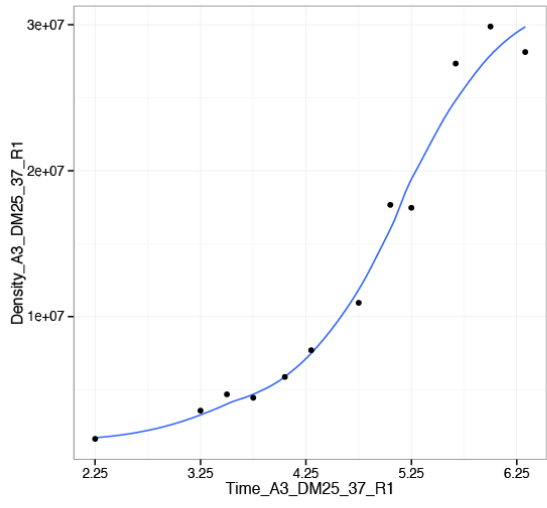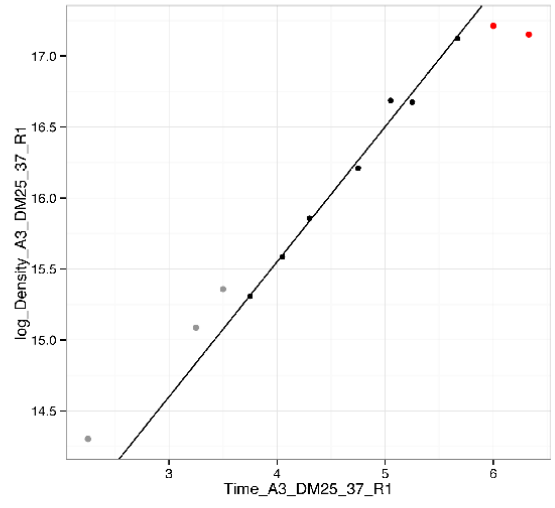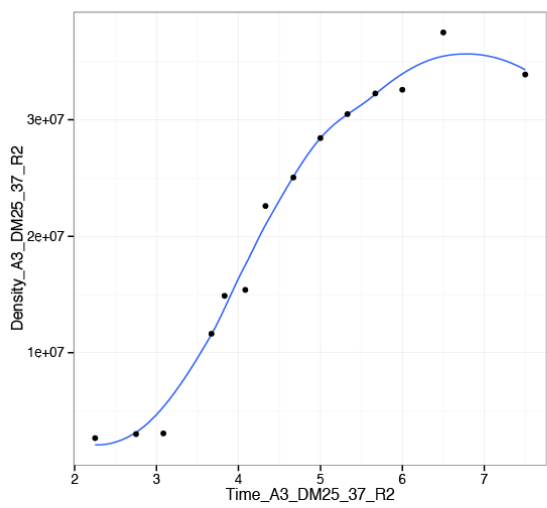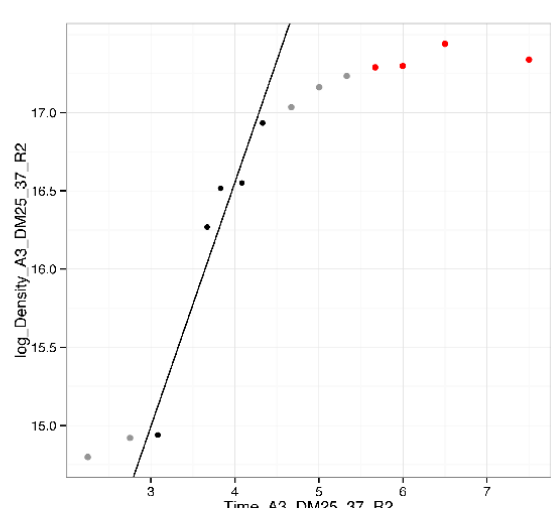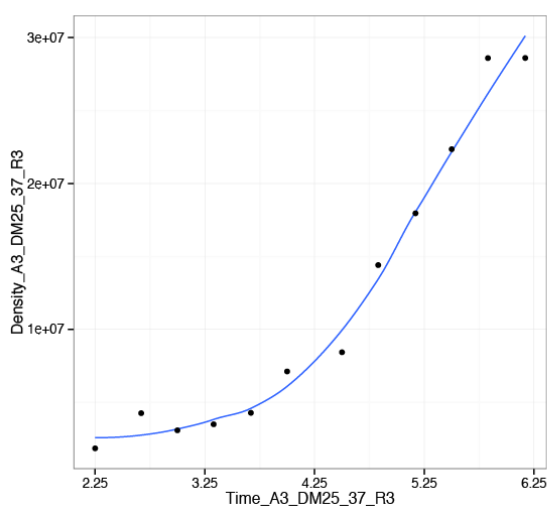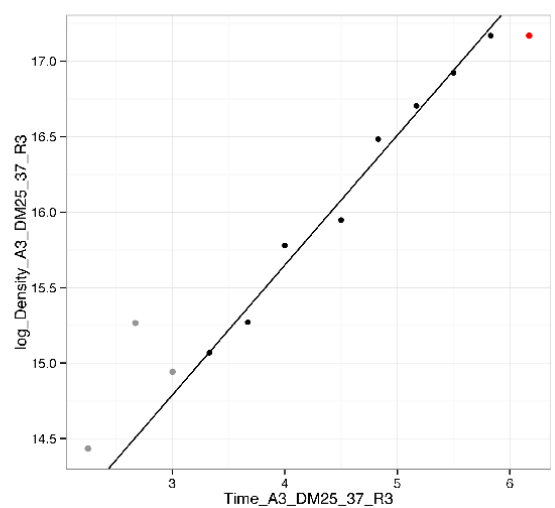

**Fig S8. Growth curves of each of the strains and replicates used in this study.** The blue line corresponds to a local polynomial regression fitting the data (left panel). The black line (right panel) represents the linear regression fitted to the data measured in exponential phase. The values in stationary phase (red dots) were used to estimate the final yield (see *Materials and Methods*).

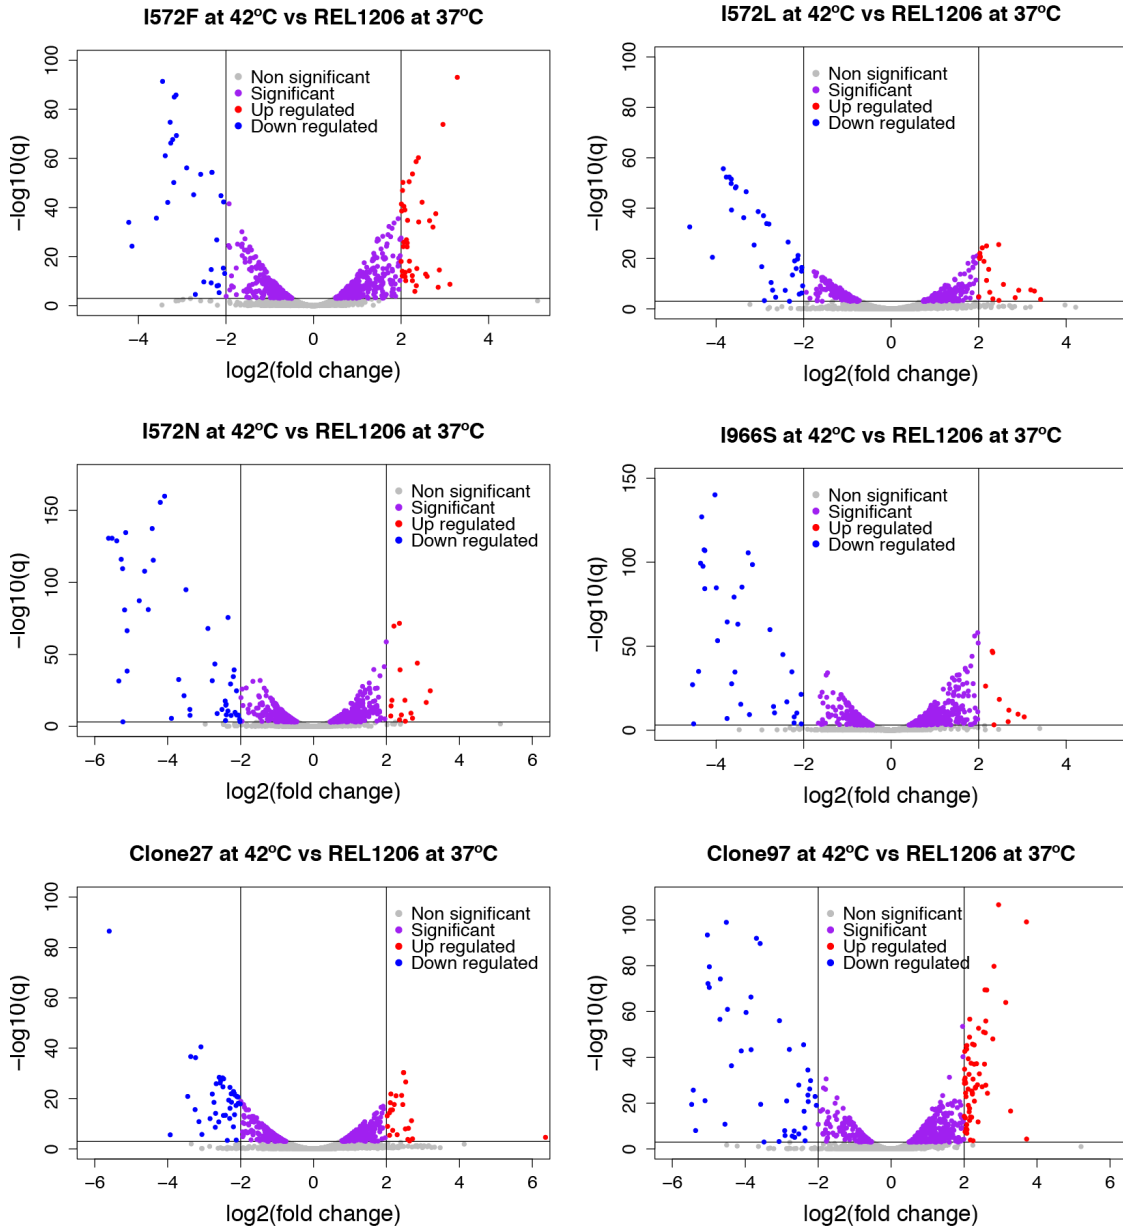

**Fig S9. GE differences between mutants/clones grown at 42°C and the ancestor grown at 37°C.** Volcano plots showing the differential expression of genes for the pairwise comparisons between mutants and high-temperature adapted clones grown at 42°C against the ancestor (REL1206) grown at 37°C.
