# Supplementary material for: First-Step Mutations during Adaptation Restore the Expression of Hundreds of Genes
Source: PubMed Central journal article supplement — Mol Biol Evol. 2015 Oct 24;33(1):25–39. doi: 10.1093/molbev/msv228 (PMC4693981; doi:10.1093/molbev/msv228), 2015-10-24
Supplement: supp_msv228_SupplementaryTables.pdf [file supp_msv228_SupplementaryTables.pdf]

## Supplementary Tables

**Table S1.** Families of highly differentially expressed genes (and GO significant enrichment categories) during the acclimation response.

| Target function/Pathway<br>(GO enrichment category)                               | Gene              | Products/putative cellular functions                   | log <sub>2</sub> fold<br>change <sup>1</sup> |
|-----------------------------------------------------------------------------------|-------------------|--------------------------------------------------------|----------------------------------------------|
| <b>DOWN-REGULATED GENES</b>                                                       |                   |                                                        |                                              |
| <b>Flagellum</b><br>(Bacterial-type flagellum-dependent cell motility GO:0071973) | <i>flgA</i>       | Flagellar biosynthesis; hook-filament junction protein | -5.4                                         |
|                                                                                   | <i>flgB</i>       | Flagellar basal-body rod protein FlgB                  | -6.8                                         |
|                                                                                   | <i>flgC</i>       | Flagellar basal-body rod protein FlgC                  | -7.4                                         |
|                                                                                   | <i>flgD</i>       | Flagellar biosynthesis                                 | -7.2                                         |
|                                                                                   | <i>flgE</i>       | Flagellar hook protein FlgE                            | -7.3                                         |
|                                                                                   | <i>flgF</i>       | Flagellar basal-body rod protein FlgF                  | -7.2                                         |
|                                                                                   | <i>flgG</i>       | Flagellar basal-body rod protein FlgG                  | -7.3                                         |
|                                                                                   | <i>flgH</i>       | Flagellar L-ring protein FlgH                          | -6.9                                         |
|                                                                                   | <i>flgI</i>       | Flagellar P-ring protein FlgI                          | -6.3                                         |
|                                                                                   | <i>flgJ</i>       | Flagellar protein FlgJ                                 | -5.7                                         |
|                                                                                   | <i>flgK</i>       | Flagellar biosynthesis; hook-filament junction protein | -4.8                                         |
|                                                                                   | <i>flgL</i>       | Flagellar biosynthesis; hook-filament junction protein | -3.9                                         |
|                                                                                   | <i>flgN</i>       | Flagellar biosynthesis protein FlgN                    | -3.8                                         |
|                                                                                   | <i>flhA</i>       | Flagellar biosynthesis protein FlhA                    | -5.6                                         |
|                                                                                   | <i>flhB</i>       | Flagellar biosynthesis protein FlhB                    | -6.2                                         |
| <i>flhE</i>                                                                       | Flagellar protein | -6.6                                                   |                                              |
| <b>Ribosomal proteins</b><br>(Structural constituent of ribosomes GO:0003735)     | <i>rplA</i>       | 50S ribosomal subunit protein L1                       | -4.0                                         |
|                                                                                   | <i>rplB</i>       | 50S ribosomal subunit protein L2                       | -4.4                                         |
|                                                                                   | <i>rplC</i>       | 50S ribosomal subunit protein L3                       | -4.8                                         |
|                                                                                   | <i>rplD</i>       | 50S ribosomal subunit protein L4                       | -4.8                                         |
|                                                                                   | <i>rplE</i>       | 50S ribosomal subunit protein L5                       | -3.4                                         |
|                                                                                   | <i>rplF</i>       | 50S ribosomal subunit protein L6                       | -3.3                                         |
|                                                                                   | <i>rplI</i>       | 50S ribosomal subunit protein L9                       | -4.8                                         |
|                                                                                   | <i>rplJ</i>       | 50S ribosomal subunit protein L10                      | -3.6                                         |
|                                                                                   | <i>rplK</i>       | 50S ribosomal subunit protein L11                      | -3.8                                         |
|                                                                                   | <i>rplL</i>       | 50S ribosomal subunit protein L12                      | -3.6                                         |
|                                                                                   | <i>rplM</i>       | 50S ribosomal subunit protein L13                      | -3.4                                         |

|             |                                   |      |
|-------------|-----------------------------------|------|
| <i>rplN</i> | 50S ribosomal subunit protein L14 | -2.8 |
| <i>rplO</i> | 50S ribosomal subunit protein L15 | -2.9 |
| <i>rplP</i> | 50S ribosomal subunit protein L16 | -3.5 |
| <i>rplQ</i> | 50S ribosomal subunit protein L17 | -3.4 |
| <i>rplR</i> | 50S ribosomal subunit protein L18 | -3.2 |
| <i>rplS</i> | 50S ribosomal subunit protein L19 | -3.4 |
| <i>rplT</i> | 50S ribosomal subunit protein L20 | -3.2 |
| <i>rplU</i> | 50S ribosomal subunit protein L21 | -2.6 |
| <i>rplV</i> | 50S ribosomal subunit protein L22 | -4.0 |
| <i>rplW</i> | 50S ribosomal subunit protein L23 | -4.0 |
| <i>rplX</i> | 50S ribosomal subunit protein L24 | -3.4 |
| <i>rplY</i> | 50S ribosomal subunit protein L25 | -2.9 |
| <i>rpmA</i> | 50S ribosomal subunit protein L27 | -2.6 |
| <i>rpmB</i> | 50S ribosomal subunit protein L28 | -3.2 |
| <i>rpmC</i> | 50S ribosomal subunit protein L29 | -2.9 |
| <i>rpmD</i> | 50S ribosomal subunit protein L30 | -3.2 |
| <i>rpmE</i> | 50S ribosomal subunit protein L31 | -3.2 |
| <i>rpmF</i> | 50S ribosomal subunit protein L32 | -2.3 |
| <i>rpmG</i> | 50S ribosomal subunit protein L33 | -2.9 |
| <i>rpmH</i> | 50S ribosomal subunit protein L34 | -3.5 |
| <i>rpmI</i> | 50S ribosomal subunit protein L35 | -1.5 |
| <i>rpmJ</i> | 50S ribosomal subunit protein L36 | -2.9 |
| <i>rpsA</i> | 30S ribosomal subunit protein S1  | -2.8 |
| <i>rpsB</i> | 30S ribosomal subunit protein S2  | -2.5 |
| <i>rpsC</i> | 30S ribosomal subunit protein S3  | -3.7 |
| <i>rpsD</i> | 30S ribosomal subunit protein S4  | -2.9 |
| <i>rpsE</i> | 30S ribosomal subunit protein S5  | -2.7 |
| <i>rpsF</i> | 30S ribosomal subunit protein S6  | -4.0 |
| <i>rpsG</i> | 30S ribosomal subunit protein S7  | -3.0 |
| <i>rpsH</i> | 30S ribosomal subunit protein S8  | -2.9 |
| <i>rpsI</i> | 30S ribosomal subunit protein S9  | -4.3 |
| <i>rpsJ</i> | 30S ribosomal subunit protein S10 | -4.2 |
| <i>rpsK</i> | 30S ribosomal subunit protein S11 | -3.7 |
| <i>rpsL</i> | 30S ribosomal subunit protein S12 | -3.7 |
| <i>rpsM</i> | 30S ribosomal subunit protein S13 | -2.6 |
| <i>rpsN</i> | 30S ribosomal subunit protein S14 | -2.6 |
| <i>rpsO</i> | 30S ribosomal subunit protein S15 | -2.4 |

|                                                                          |             |                                                            |      |
|--------------------------------------------------------------------------|-------------|------------------------------------------------------------|------|
|                                                                          | <i>rpsP</i> | 30S ribosomal subunit protein S16                          | -3.1 |
|                                                                          | <i>rpsQ</i> | 30S ribosomal subunit protein S17                          | -3.1 |
|                                                                          | <i>rpsR</i> | 30S ribosomal subunit protein S18                          | -4.2 |
|                                                                          | <i>rpsS</i> | 30S ribosomal subunit protein S19                          | -3.7 |
|                                                                          | <i>rpsT</i> | 30S ribosomal subunit protein S20                          | -3.0 |
|                                                                          | <i>rpsU</i> | 30S ribosomal subunit protein S21                          | -3.4 |
| <b>Methionine biosynthesis</b>                                           | <i>metA</i> | homoserine O-succinyltransferase                           | -3.4 |
| (Sulfur amino acid biosynthetic process                                  | <i>metB</i> | O-succinylhomoserine lyase                                 | -0.9 |
| GO:0000097)                                                              | <i>metC</i> | Cystathionine $\beta$ -lyase                               | -1.8 |
|                                                                          | <i>metE</i> | Cobalamin-independent homocysteine transmethylease         | -5.3 |
|                                                                          | <i>metF</i> | 5,10-methylenetetrahydrofolate reductase                   | -3.5 |
|                                                                          | <i>metG</i> | methionyl-tRNA synthetase                                  | -2.0 |
|                                                                          | <i>metH</i> | cobalamin-dependent methionine synthetase                  | -1.1 |
|                                                                          | <i>metI</i> | L/D-methionine ABC transporter membrane subunit            | -2.2 |
|                                                                          | <i>metJ</i> | MetJ transcriptional repressor                             | -1.2 |
|                                                                          | <i>metK</i> | S-adenosylmethionine synthetase                            | -3.9 |
|                                                                          | <i>metL</i> | Aspartate kinase                                           | -1.8 |
|                                                                          | <i>metN</i> | L/D-methionine ABC transporter ATP binding subunit         | -3.3 |
|                                                                          | <i>metQ</i> | L/D-methionine ABC transporter periplasmic binding subunit | -2.6 |
|                                                                          | <i>metR</i> | MetR DNA-binding transcriptional dual regulator            | -2.0 |
| <b>Pathway for <i>de novo</i> biosynthesis of purine nucleosides</b>     | <i>purB</i> | Adenylosuccinate lyase                                     | -2.3 |
| (purine nucleotide biosynthetic process;                                 | <i>purC</i> | PurC                                                       | -3.0 |
| GO:0006164; $P=2.68 \times 10^{-9}$ )                                    | <i>purD</i> | Phosphoribosylamine-glycine ligase                         | -2.6 |
|                                                                          | <i>purE</i> | PurE                                                       | -3.5 |
|                                                                          | <i>purF</i> | PurF                                                       | -2.5 |
|                                                                          | <i>purH</i> | AICAR transformylase/ IMP cyclohydrolase                   | -3.1 |
|                                                                          | <i>purK</i> | N5-carboxyaminoimidazole ribonucleotide synthetase monomer | -3.0 |
|                                                                          | <i>purL</i> | Phosphoribosylformylglycinamide synthetase                 | -2.7 |
|                                                                          | <i>purM</i> | PurM                                                       | -3.5 |
|                                                                          | <i>purN</i> | Phosphoribosylglycinamide formyltransferase 1              | -2.6 |
|                                                                          | <i>purR</i> | PurR                                                       | -2.8 |
|                                                                          | <i>purT</i> | Phosphoribosylglycinamide formyltransferase 2              | -2.9 |
| <b>Pathway for <i>de novo</i> biosynthesis of pyrimidine nucleosides</b> | <i>pyrB</i> | Aspartate carbamoyltransferase, catalytic subunit          | -3.1 |
| (pyrimidine nucleotide biosynthetic process;                             | <i>pyrC</i> | PyrC                                                       | -1.9 |
| GO:0006221; $P=2.08 \times 10^{-2}$ )                                    | <i>pyrD</i> | Dihydroorotate dehydrogenase, type 2                       | -3.1 |
|                                                                          | <i>pyrE</i> | Orotate phosphoribosyltransferase (PyrE)                   | -3.3 |
|                                                                          | <i>pyrF</i> | Orotidine-5'-phosphate-decarboxylase (PyrF)                | -3.5 |

|                                                                                    |             |                                                                      |      |
|------------------------------------------------------------------------------------|-------------|----------------------------------------------------------------------|------|
|                                                                                    | <i>pyrI</i> | Aspartate carbamoyltransferase, PyrI subunit                         | -2.7 |
| <b>Up-regulated genes</b>                                                          |             |                                                                      |      |
| <b>Arginine degradation pathway</b><br>(Arginine catabolic process;<br>GO:0006527) | <i>astA</i> | Arginine succinyltransferase (AstA)                                  | 4.8  |
|                                                                                    | <i>astB</i> | Succinylarginine dihydrolase (AstB)                                  | 4.3  |
|                                                                                    | <i>astC</i> | Succinylornithine transaminase (AstC)                                | 4.7  |
|                                                                                    | <i>astD</i> | Succinylglutamate semialdehyde dehydrogenase                         | 4.2  |
|                                                                                    | <i>astE</i> | Succinylglutamate desuccinylase                                      | 4.6  |
| <b>Alcohol catabolic process</b><br>(GO:0046164)                                   | <i>mhpA</i> | 3-(3-hydroxyphenyl)propionate 2-hydroxylase                          | 1.2  |
|                                                                                    | <i>mhpB</i> | 2-hydroxy-6-ketono-2,4-dienedioate hydrolase                         | 1.2  |
|                                                                                    | <i>glcD</i> | glycolate oxidase, predicted FAD-linked subunit                      | 1.1  |
|                                                                                    | <i>glcE</i> | glycolate oxidase, predicted FAD-binding subunit                     | 1.4  |
|                                                                                    | <i>glcF</i> | glycolate oxidase, predicted iron-sulfur subunit                     | 2.1  |
|                                                                                    | <i>glxK</i> | tartronate semialdehyde reductase 2                                  | 1.8  |
|                                                                                    | <i>eutC</i> | ethanolamine ammonia-lyase, $\beta$ subunit                          | 1.0  |
|                                                                                    | <i>eutD</i> | phosphate acetyltransferase monomer                                  | 1.4  |
|                                                                                    | <i>eutP</i> | conserved protein with nucleoside triphosphate hydrolase domain      | 2.3  |
|                                                                                    | <i>eutQ</i> | conserved protein                                                    | 1.4  |
|                                                                                    | <i>eutT</i> | predicted cobalamine adenosyltransferase in ethanolamine utilization | 1.6  |
| <b>Glycerol catabolic process</b><br>(GO:0019563; $P=5.19 \times 10^{-2}$ )        | <i>glpA</i> | anaerobic glycerol-3-phosphate dehydrogenase subunit A               | 3.0  |
|                                                                                    | <i>glpB</i> | anaerobic glycerol-3-phosphate dehydrogenase subunit B               | 3.4  |
|                                                                                    | <i>glpC</i> | anaerobic glycerol-3-phosphate dehydrogenase subunit C               | 3.3  |
|                                                                                    | <i>glpD</i> | glycerol-3-phosphate dehydrogenase, aerobic                          | 2.1  |
|                                                                                    | <i>glpK</i> | glycerol kinase                                                      | 1.7  |
|                                                                                    | <i>glpQ</i> | glycerophosphoryl diester phosphodiesterase, periplasmic             | 2.7  |
|                                                                                    | <i>glpT</i> | glycerol-3-phosphate:phosphate antiporter                            | 2.9  |
|                                                                                    | <i>glpX</i> | fructose 1,6-bisphosphatase II                                       | 1.1  |
| <b>Monosaccharide transport</b><br>(GO:0015749)                                    | <i>araF</i> | arabinose ABC transporter - periplasmic binding protein              | 4.2  |
|                                                                                    | <i>araG</i> | arabinose ABC transporter - ATP binding subunit                      | 2.8  |
|                                                                                    | <i>araH</i> | arabinose ABC transporter - membrane subunit                         | 2.0  |
|                                                                                    | <i>xylF</i> | xylose ABC transporter - periplasmic binding protein                 | 4.1  |
|                                                                                    | <i>xylH</i> | xylose ABC transporter - membrane subunit                            | 1.3  |

<sup>1</sup> The logarithm (to basis 2) of the fold change

**Table S2.** List of i) previously reported up-regulate genes during the heat stress response, ii) previously reported up-regulated genes during the general stress response and, iii) RNAP genes, with their associated gene expression changes observed in our study.

| Gene                                | Protein/Product (Function)                                   | Counts<br>37°C <sup>1</sup> | Counts<br>42°C <sup>1</sup> | log <sub>2</sub> fold<br>change <sup>2</sup> | q <sup>3</sup> |
|-------------------------------------|--------------------------------------------------------------|-----------------------------|-----------------------------|----------------------------------------------|----------------|
| <b>Heat shock genes<sup>4</sup></b> |                                                              |                             |                             |                                              |                |
| <i>rpoH</i>                         | RpoH σ32 Sigma factor controlling the heat shock response    | 16804                       | 15018                       | -0.2                                         | 0.563          |
| <i>clpA</i>                         | ClpA                                                         | 10115                       | 25502                       | 1.3                                          | 1.59E-10       |
| <i>clpB (htpM)</i>                  | ClpB (Hsp100)                                                | 29641                       | 16864                       | -0.8                                         | 0.003          |
| <i>clpP</i>                         | ClpP (protease)                                              | 15448                       | 13925                       | -0.1                                         | 0.497          |
| <i>clpX</i>                         | ClpX (protease)                                              | 42812                       | 29679                       | -0.5                                         | 0.014          |
| <i>creB</i>                         | CreB (catabolic response regulator)                          | 2802                        | 2362                        | -0.2                                         | 0.367          |
| <i>cspD</i>                         | CspD (cold shock protein)                                    | 10123                       | 68262                       | 2.8                                          | 2.83E-07       |
| <i>dnaJ</i>                         | DnaJ (Hsp40)                                                 | 26836                       | 4420                        | -2.6                                         | 2.71E-11       |
| <i>dnaK</i>                         | DnaK (Hsp70)                                                 | 139053                      | 27492                       | -2.3                                         | 2.17E-08       |
| <i>fkpA</i>                         | FkpA (heat shock peptidyl-prolyl isomerase)                  | 60517                       | 21956                       | -1.5                                         | 1.17E-11       |
| <i>fxsA (yjeG)</i>                  | FxsA overproduction inhibits F exclusion of bacteriophage T7 | 5116                        | 3624                        | -0.5                                         | 0.113          |
| <i>gapA</i>                         | GapA, glyceraldehyde-3-phosphate dehydrogenase               | 485230                      | 63805                       | -2.9                                         | 1.17E-33       |
| <i>groEL</i>                        | GroEL (Hsp60)                                                | 288824                      | 128432                      | -1.2                                         | 3.44E-04       |
| <i>groES</i>                        | GroES (Hsp10)                                                | 58890                       | 32344                       | -0.9                                         | 0.006          |
| <i>grpE</i>                         | GrpE                                                         | 26524                       | 8890                        | -1.6                                         | 7.96E-07       |
| <i>hflB (ftsh)</i>                  | HflB (ATP-dependent protease)                                | 125903                      | 45546                       | -1.5                                         | 5.75E-10       |
| <i>hflX</i>                         | HflX (protease)                                              | 24434                       | 31466                       | 0.4                                          | 0.146          |
| <i>hslO (yrfI)</i>                  | Hsp33                                                        | 10684                       | 4626                        | -1.2                                         | 7.60E-06       |
| <i>hslR (yrfH)</i>                  | YrfH (hsp15)                                                 | 3374                        | 1949                        | -0.8                                         | 0.006          |
| <i>hslU</i>                         | HslU (protease)                                              | 33809                       | 10710                       | -1.7                                         | 1.02E-05       |
| <i>hslV</i>                         | HslV (protease)                                              | 7534                        | 2391                        | -1.7                                         | 1.33E-05       |
| <i>htpG</i>                         | HtpG (Hsp90)                                                 | 56543                       | 8294                        | -2.8                                         | 2.20E-12       |
| <i>htpX</i>                         | HtpX (membrane protein)                                      | 31843                       | 12157                       | -1.4                                         | 1.62E-08       |
| <i>ibpA (hslT)</i>                  | IbpA (sHsp)                                                  | 2234                        | 781                         | -1.5                                         | 4.93E-04       |
| <i>ibpB (hslS, htpE)</i>            | IbpB (sHsp)                                                  | 354                         | 797                         | 1.2                                          | 9.57E-06       |
| <i>Int (cutE)</i>                   | CutE (catalyses the last step in lipoprotein maturation)     | 6132                        | 2496                        | -1.3                                         | 1.78E-04       |
| <i>lon</i>                          | Lon (protease)                                               | 2256                        | 1763                        | -0.4                                         | 0.159          |
| <i>macB (ybjZ)</i>                  | YbjZ (putative component transport system)                   | 4918                        | 4028                        | -0.3                                         | 0.293          |
| <i>miaA (trpX)</i>                  | MiaA (tRNA-transferase)                                      | 29510                       | 32309                       | 0.1                                          | 0.737          |

|                                          |                                                                   |       |       |      |          |
|------------------------------------------|-------------------------------------------------------------------|-------|-------|------|----------|
| <i>mutM</i>                              | MutM (DNA glycosylase)                                            | 2028  | 511   | -2.0 | 9.53E-15 |
| <i>narP</i>                              | NarP (nitrate response regulator)                                 | 1330  | 1335  | 0.0  | 1.000    |
| <i>phoB</i>                              | PhoB (DNA-binding response regulator)                             | 1281  | 2129  | 0.7  | 0.002    |
| <i>phoR</i>                              | PhoR (histidine kinase)                                           | 1045  | 1520  | 0.5  | 0.023    |
| <i>prlC (opdA)</i>                       | PrlC (peptidase)                                                  | 19266 | 16612 | -0.2 | 0.343    |
| <i>rpoD</i>                              | RpoD $\sigma$ 70                                                  | 43196 | 34605 | -0.3 | 0.120    |
| <i>rrmJ (ftsJ)</i>                       | FtsJ (cell division)                                              | 17556 | 13517 | -0.4 | 0.101    |
| <i>sdaC</i>                              | SdaC (serine transporter)                                         | 8079  | 1651  | -2.3 | 1.46E-11 |
| <i>topA</i>                              | TopA (topoisomerase)                                              | 65053 | 35112 | -0.9 | 1.02E-04 |
| <i>yafD</i>                              | YafD                                                              | 5302  | 4670  | -0.2 | 0.539    |
| <i>yafE</i>                              | YafE (putative biotin synthesis)                                  | 701   | 857   | 0.3  | 0.238    |
| <i>ybbN</i>                              | YbbN (putative thioredoxin like)                                  | 13229 | 5801  | -1.2 | 1.96E-07 |
| <i>ybeY</i>                              | YbeY (metal binding, required for translation at 42°C)            | 5423  | 4127  | -0.4 | 0.098    |
| <i>ybeZ</i>                              | YbeZ (pho regulon protein)                                        | 13009 | 12443 | -0.1 | 0.727    |
| <i>yccV (hspQ)</i>                       | HspQ (Hsp, hemimethylated DNA-binding protein)                    | 5380  | 3375  | -0.7 | 0.007    |
| <i>ycjF</i>                              | YcjF (putative membrane protein)                                  | 2863  | 1442  | -1.0 | 5.93E-04 |
| <i>yhdN</i>                              | YhdN (DUF1992 family protein)                                     | 992   | 879   | -0.2 | 0.587    |
| <i>yheL</i>                              | YheL (required for tRNA synthesis)                                | 1914  | 1271  | -0.6 | 0.033    |
| <i>yhgH</i>                              | YhgH (protein required for utilization of DNA as carbon source)   | 2677  | 1323  | -1.0 | 2.08E-05 |
| <i>yrfG</i>                              | YrfG (phosphatase)                                                | 3796  | 3472  | -0.1 | 0.651    |
| <b>General stress genes <sup>5</sup></b> |                                                                   |       |       |      |          |
| <i>rpoS</i>                              | RpoS $\sigma$ S Master regulator of the general stress response   | 17282 | 43645 | 1.3  | 0.010    |
| <i>aidB</i>                              | Putative acyl-CoA dehydrogenase (flavoprotein)                    | 702   | 5542  | 3.0  | 1.31E-11 |
| <i>artM</i>                              | Arginine transport protein (ABC superfamily, membrane)            | 5208  | 5280  | 0.0  | 0.833    |
| <i>artP</i>                              | Arginine transport protein (ABC superfamily, ATP-binding subunit) | 4890  | 9687  | 1.0  | 1.50E-06 |
| <i>blc</i>                               | Outer membrane lipoprotein (lipocalin)                            | 542   | 3226  | 2.6  | 3.54E-13 |
| <i>bolA</i>                              | Transcriptional activator of morphogenic pathway (BoIA family)    | 4725  | 16371 | 1.8  | 1.25E-04 |
| <i>cbpA</i>                              | Curved DNA-binding protein, cochaperone of DnaK (Hsp40 family)    | 1886  | 5203  | 1.5  | 1.84E-11 |
| <i>csiD</i>                              | Conserved protein with clavamate synthase-like domain             | 1403  | 19731 | 3.8  | 3.27E-06 |
| <i>dps</i>                               | Stress response DNA-binding protein with ferritin-like domain     | 3598  | 30771 | 3.1  | 1.02E-16 |
| <i>fbaB</i>                              | Fructose-bisphosphate aldolase class I                            | 1200  | 10070 | 3.1  | 1.65E-47 |
| <i>fic</i>                               | Stationary-phase protein                                          | 3121  | 1386  | -1.2 | 5.19E-06 |
| <i>gabD</i>                              | Succinate-semialdehyde dehydrogenase NADP dependent               | 1892  | 17543 | 3.2  | 1.13E-19 |
| <i>gabP</i>                              | Gamma-aminobutyrate transport protein                             | 549   | 4498  | 3.0  | 9.23E-35 |
| <i>gadA</i>                              | Glutamate decarboxylase, isozyme A                                | 193   | 489   | 1.3  | 2.67E-06 |
| <i>gadB</i>                              | Glutamate decarboxylase, isozyme B                                | 227   | 934   | 2.0  | 5.85E-15 |
| <i>gadX</i>                              | GadX DNA-binding transcriptional dual regulator                   | 1262  | 10798 | 3.1  | 1.05E-16 |

|                    |                                                                      |       |       |      |           |
|--------------------|----------------------------------------------------------------------|-------|-------|------|-----------|
| <i>hdeA</i>        | HdeA dimer, inactive form of acid-resistance protein                 | 228   | 474   | 1.1  | 3.34E-04  |
| <i>hdeB</i>        | Acid stress chaperon                                                 | 51    | 167   | 1.7  | 9.85E-05  |
| <i>hnr (rssB)</i>  | Response regulator involved in protein turnover                      | 2187  | 6389  | 1.5  | 3.29E-13  |
| <i>katE</i>        | Catalase; hydroperoxidase HP11 (III), RpoS dependent                 | 1704  | 11430 | 2.7  | 3.36E-40  |
| <i>ldcC</i>        | Lysine decarboxylase 2, constitutive                                 | 1739  | 6305  | 1.9  | 4.67E-08  |
| <i>mscL</i>        | Mechanosensitive channel                                             | 3183  | 6212  | 1.0  | 0.060     |
| <i>msyB</i>        | Acidic protein suppresses mutants lacking function of protein export | 1286  | 29382 | 4.5  | 2.10E-21  |
| <i>narU</i>        | Nitrate extrusion protein                                            | 215   | 325   | 0.6  | 0.140     |
| <i>osmB</i>        | Lipoprotein osmotically inducible                                    | 384   | 4641  | 3.6  | 1.13E-58  |
| <i>osmC</i>        | Resistance protein, osmotically inducible                            | 980   | 8881  | 3.2  | 1.49E-50  |
| <i>osmY</i>        | Hyperosmotically inducible periplasmic protein                       | 1281  | 5475  | 2.1  | 2.84E-22  |
| <i>otsA</i>        | Trehalose-6-phosphate synthase                                       | 1737  | 9214  | 2.4  | 1.87E-30  |
| <i>otsB</i>        | Trehalose-6-phosphate phosphatase, biosynthetic                      | 614   | 5057  | 3.0  | 1.99E-33  |
| <i>pdhR</i>        | Transcriptional repressor for pyruvate dehydrogenase complex         | 6187  | 2713  | -1.2 | 3.31E-05  |
| <i>poxB</i>        | Pyruvate dehydrogenase/oxidase: FAD and thiamine PPi -binding        | 1664  | 13702 | 3.0  | 4.54E-21  |
| <i>rpsV (sra)</i>  | 30S ribosomal subunit protein S22                                    | 640   | 18433 | 4.8  | 8.55E-103 |
| <i>rssA (ychK)</i> | Putative transmembrane protein                                       | 3027  | 5405  | 0.8  | 9.25E-05  |
| <i>talA</i>        | Transaldolase A                                                      | 1723  | 8375  | 2.3  | 3.25E-27  |
| <i>tam</i>         | Trans-aconitate methyltransferase                                    | 399   | 2251  | 2.5  | 3.37E-27  |
| <i>tktB</i>        | Transketolase 2, thiamon binding, isozyme                            | 2890  | 16746 | 2.5  | 1.21E-34  |
| <i>treA</i>        | Trehalase, periplasmic                                               | 771   | 10638 | 3.8  | 1.35E-58  |
| <i>treF</i>        | Trehalase, cytoplasmic                                               | 886   | 2712  | 1.6  | 1.75E-12  |
| <i>wrbA</i>        | Flavodoxin-like protein, trp repressor-binding protein               | 1801  | 21322 | 3.6  | 1.50E-54  |
| <i>xasA (gadC)</i> | glutamic acid:4-aminobutyrate antiporter                             | 534   | 1604  | 1.6  | 1.20E-11  |
| <i>ybiO</i>        | Putative transport protein, integral membrane location               | 514   | 1148  | 1.2  | 3.18E-06  |
| <i>ycgB</i>        | Conserved protein                                                    | 1177  | 12009 | 3.4  | 8.52E-14  |
| <i>ycgZ</i>        | Predicted protein                                                    | 173   | 1567  | 3.2  | 7.76E-38  |
| <i>yciF</i>        | Putative structural protein                                          | 74    | 1494  | 4.3  | 4.07E-43  |
| <i>yciG</i>        | Predicted protein                                                    | 54    | 1158  | 4.4  | 1.84E-24  |
| <i>ydaM</i>        | diguanylate cyclase                                                  | 1184  | 4562  | 1.9  | 1.26E-19  |
| <i>ydcS</i>        | Putative transport protein (ABC superfamily, periplasmic)            | 1042  | 22275 | 4.4  | 9.74E-08  |
| <i>ydgA</i>        | Conserved protein                                                    | 20388 | 18034 | -0.2 | 0.298     |
| <i>yedU (hchA)</i> | glyoxalase III, Hsp31 molecular chaperone                            | 169   | 187   | 0.2  | 0.513     |
| <i>ygaF</i>        | Enzyme: L-2-hydroxylutarate oxidase                                  | 1095  | 12110 | 3.5  | 7.71E-14  |
| <i>ygaM</i>        | Predicted protein                                                    | 1016  | 9599  | 3.2  | 4.19E-52  |
| <i>ygaU</i>        | Predicted proten                                                     | 1277  | 15746 | 3.6  | 3.96E-21  |
| <i>yggE</i>        | Conserved protein                                                    | 3234  | 17585 | 2.4  | 6.11E-32  |

|                                               |                                                            |        |       |      |          |
|-----------------------------------------------|------------------------------------------------------------|--------|-------|------|----------|
| <i>ygiG</i>                                   | Putrescine aminotransferase                                | 1657   | 17038 | 3.4  | 1.03E-52 |
| <i>yhbo</i>                                   | Protein involved in stress response                        | 196    | 567   | 1.5  | 7.55E-08 |
| <i>yhiD</i>                                   | Predicted Mg(2+) transport ATPase                          | 47     | 51    | 0.1  | 0.838    |
| <i>yhiE (gadE)</i>                            | Transcriptional regulator for gasABC operon                | 80     | 2963  | 5.2  | 2.74E-95 |
| <i>yhiO (uspB)</i>                            | Universal stress protein B                                 | 627    | 3684  | 2.6  | 2.64E-06 |
| <i>yhiU</i>                                   | MdtEF-TolC multidrug efflux transport system               | 201    | 781   | 2.0  | 2.24E-13 |
| <i>yhiW (gadW)</i>                            | GadW DNA-binding transcriptional dual regulator            | 273    | 1923  | 2.8  | 1.87E-27 |
| <i>yhjG</i>                                   | Predicted outer membrane biogenesis protein                | 1059   | 7251  | 2.8  | 4.31E-08 |
| <i>yiaG</i>                                   | Putative transcriptional regulator with DNA-binding domain | 517    | 3103  | 2.6  | 4.35E-08 |
| <i>yjbJ</i>                                   | Predicted stress response protein                          | 558    | 5164  | 3.2  | 2.38E-48 |
| <i>yjgB</i>                                   | Ahr aldehyde reductase, NADPH-dependent                    | 440    | 3052  | 2.8  | 1.41E-17 |
| <i>ymgA</i>                                   | Protein involved in biofilm formation                      | 58     | 1030  | 4.1  | 5.19E-49 |
| <i>ynhG</i>                                   | L,D-transpeptidase YnhG                                    | 1448   | 5360  | 1.9  | 1.30E-05 |
| <b>RNA polymerase genes and sigma factors</b> |                                                            |        |       |      |          |
| <i>rpoA</i>                                   | $\alpha$ subunit of the RNA polymerase                     | 558792 | 56852 | -3.3 | 2.56E-32 |
| <i>rpoB</i>                                   | $\beta$ subunit of the RNA polymerase                      | 241709 | 71355 | -1.8 | 8.21E-15 |
| <i>rpoC</i>                                   | $\beta'$ subunit of the RNA polymerase                     | 255389 | 66283 | -1.9 | 1.83E-17 |
| <i>rpoZ</i>                                   | $\omega$ subunit of the RNA polymerase                     | 11084  | 4299  | -1.4 | 3.73E-09 |
| <i>rpoD</i>                                   | RNA polymerase $\sigma$ 70                                 | 43196  | 34605 | -0.3 | 0.120    |
| <i>rpoE</i>                                   | RNA polymerase $\sigma$ E                                  | 30888  | 23118 | -0.4 | 0.095    |
| <i>rpoN</i>                                   | RNA polymerase $\sigma$ 54                                 | 21812  | 24851 | 0.2  | 0.540    |

<sup>1</sup> Mean normalized counts (sequence reads) from the indicated temperature

<sup>2</sup> The logarithm (to basis 2) of the fold change

<sup>3</sup> *q* value (adjusted by the Benjamini-Hochberg procedure)

<sup>4</sup> Heat shock genes (and synonyms) expressed in *E.coli* during transient up-shift in temperature (Riehle et al. 2003, Nonaka et al. 2006, Gunasekera et al. 2008).

<sup>5</sup> General stress response genes induced by  $\sigma^S$  (Weber et al. 2005).



**Table S3.** Estimation of the lag phase by interpolation of the growth rate for the first-step mutants and the ancestor.

| Strain       | $\tau^1$ |       | $P^2$        |
|--------------|----------|-------|--------------|
|              | 37°C     | 42°C  |              |
| Ancestor     | 0.0      | 1.0   | 0.247        |
| SE           | (0.0)    | (0.6) |              |
| <i>I572F</i> | 0.2      | 2.4   | <b>0.009</b> |
| SE           | (0.2)    | (0.4) |              |
| $P^3$        | 0.423    | 0.147 |              |
| <i>I572L</i> | 0.0      | 2.5   | 0.072        |
| SE           | (0.03)   | (0.7) |              |
| $P^3$        | 0.423    | 0.188 |              |
| <i>I572N</i> | 0.5      | 2.5   | 0.136        |
| SE           | (0.4)    | (0.9) |              |
| $P^3$        | 0.300    | 0.253 |              |

<sup>1</sup> Duration of the effective lag phase with standard error in parenthesis.

<sup>2</sup> Significance value from a two-sample t-test. The null hypothesis is that the mean at 37°C and the mean at 42°C are equal.

<sup>3</sup> Significance value from a two-sample t-test. The null hypothesis is that the mean of the ancestor and the mean of the mutant are equal. Numbers in bold correspond to  $P$ -values < 0.05.

**Table S4.** Criteria used to classify the genes differentially expressed during the acclimation and/or adaptive response.

| Category      | Anc42 vs Anc37           | Mut42 vs Anc42           | Mut42 vs Anc37           |
|---------------|--------------------------|--------------------------|--------------------------|
| 1) Restored   | Significant $\uparrow$   | Significant $\downarrow$ | -                        |
|               | Significant $\downarrow$ | Significant $\uparrow$   | -                        |
| 2) Reinforced | Significant $\uparrow$   | Significant $\uparrow$   | Significant $\uparrow$   |
|               | Significant $\downarrow$ | Significant $\downarrow$ | Significant $\downarrow$ |
| 3) Unrestored | Significant $\uparrow$   | Non-Significant          | -                        |
|               | Significant $\downarrow$ | Non-Significant          | -                        |
| 4) Novel      | Non-Significant          | Significant $\uparrow$   | Significant $\uparrow$   |
|               | Non-Significant          | Significant $\downarrow$ | Significant $\downarrow$ |

$\uparrow$  Up-regulated genes

$\downarrow$  Down-regulated genes

Significant: significantly differentially expressed gene ( $q < 0.001$ )

Non-Significant: not significantly differentially expressed gene ( $q > 0.001$ )

**Table S5.** Mutations and gene expression changes of the high temperature adapted clone 27.

| Mutational event                                                       | Gene             | Product                                                     | Position <sup>1</sup> | Genetic effect          | log2fold change <sup>2</sup> |                    |                    |
|------------------------------------------------------------------------|------------------|-------------------------------------------------------------|-----------------------|-------------------------|------------------------------|--------------------|--------------------|
|                                                                        |                  |                                                             |                       |                         | A37 vs A42                   | A42 vs I572L       | A42 vs c27         |
| Point mutation<br><i>I250N</i>                                         | <i>secF</i>      | Polypeptide SecF involved in translocation (inner membrane) | 398676                | Amino acid substitution | <b>-1.5</b><br>***           | <b>1.2</b><br>***  | <b>1.4</b><br>***  |
| 2,896 bp Large deletion<br>From position 475,290 to position 478,186.  | <i>ybaL</i>      | Polypeptide YbaL CPA2 transporter                           | 473,629 - 475,305     | Inactivation            | -0.2                         | -0.0               | <b>-3.0</b><br>*** |
|                                                                        | <i>fsr</i>       | Transporter: fosmidomycin efflux transporter                | 475,543 - 476,763     | Deletion                | <b>-1.2</b><br>***           | 0.1                | <b>NA</b><br>***   |
|                                                                        | <i>ushA</i>      | Enzyme: 5' -deoxyribonucleotidase                           | 476,981 - 478,633     | Inactivation            | -0.1                         | 0.0                | <b>-5.4</b><br>*** |
| 71,416 bp Large deletion<br>From position 547,700 to position 619,116. | <i>ybcR</i>      | Polypeptide: DLP12 prophage                                 | 548,867 - 549,082     | Deletion                | <b>1.9</b><br>***            | <b>-1.8</b><br>*** | <b>NA</b><br>***   |
|                                                                        | <i>ybcS</i>      | Enzyme: DLP12 prophage; lysozyme                            | 549,082 - 549,579     | Deletion                | <b>1.2</b><br>***            | -1.0<br>**         | <b>NA</b><br>***   |
|                                                                        | <i>ybcT</i>      | Polypeptide: DLP12 prophage; predicted murein endopeptidase | 549,576 - 550,037     | Deletion                | <b>-2.6</b><br>***           | <b>1.9</b><br>***  | <b>NA</b><br>***   |
|                                                                        | <i>ybcU</i>      | Polypeptide: putative lipoprotein                           | 550,069 - 550,362     | Deletion                | <b>-4.0</b><br>***           | <b>2.3</b><br>***  | <b>NA</b><br>***   |
|                                                                        | <i>ECB_00510</i> | Polypeptide: hypothetical protein                           | 550,723 - 550,917     | Deletion                | 0.3                          | -0.3               | <b>NA</b><br>***   |
|                                                                        | <i>nohB</i>      | Polypeptide: DLP12 prophage; DNA packaging protein          | 551,306 - 551,881     | Deletion                | 0.4                          | -0.3               | <b>NA</b><br>***   |
|                                                                        | <i>ECB_00512</i> | Polypeptide: putative tail component of prophage            | 551,841 - 554,657     | Deletion                | 0.6<br>**                    | -0.5               | <b>NA</b><br>***   |
|                                                                        | <i>ECB_00513</i> | Polypeptide: orf                                            | 554,716 - 557,061     | Deletion                | 0.4                          | 0.0                | <b>NA</b><br>***   |
|                                                                        | <i>ECB_00514</i> | Polypeptide: orf                                            | 557,058 - 557,339     | Deletion                | 0.8                          | 0.0                | <b>NA</b><br>***   |
|                                                                        | <i>ECB_00515</i> | Polypeptide: orf                                            | 557,349 - 558,053     | Deletion                | 1.1<br>**                    | -0.7               | <b>NA</b><br>***   |
| <i>ECB_00516</i>                                                       | Polypeptide: orf | 558,064 - 558,357                                           | Deletion              | 1.5<br>**               | -0.5                         | <b>NA</b><br>***   |                    |
| <i>ECB_00517</i>                                                       | Polypeptide: orf | 558,112 -                                                   | Deletion              | 1.3                     | -1.0                         | <b>NA</b>          |                    |

|                  |                                                                                                         |                   |          |             |            |           |
|------------------|---------------------------------------------------------------------------------------------------------|-------------------|----------|-------------|------------|-----------|
|                  |                                                                                                         | 558,447           |          | *           |            | ***       |
| <i>appY</i>      | Polypeptide: APPY DNA-binding transcriptional activator                                                 | 559,033 – 559,782 | Deletion | -0.5        | 1.2        | NA<br>*** |
| <i>ompT</i>      | Enzyme: outer membrane protease VII                                                                     | 560,031 – 560,984 | Deletion | -1.6<br>*** | 1.4<br>*** | NA<br>*** |
| <i>envY</i>      | Polypeptide: EnvY DNA-binding transcriptional activator                                                 | 561,498 – 562,259 | Deletion | 0.5<br>*    | -0.2       | NA<br>*** |
| <i>ybcH</i>      | Polypeptide: predicted protein                                                                          | 562,442 – 563,332 | Deletion | 0.7<br>**   | -0.4       | NA<br>*** |
| <i>nfrA</i>      | Polypeptide: bacteriophage N4 receptor, outer membrane protein                                          | 563,333 – 566,305 | Deletion | -0.6<br>**  | -0.4       | NA<br>*** |
| <i>yhhI-2</i>    | Enzyme: putative transposase                                                                            | 568,800 – 569,936 | Deletion | 0.1         | 1.0        | NA<br>*** |
| <i>ECB_00526</i> | Polypeptide: orf                                                                                        | 570,615 – 570,776 | Deletion | -0.0        | 1.1        | NA<br>*** |
| <i>ECB_00527</i> | Polypeptide: orf                                                                                        | 570,901 – 571,191 | Deletion | -0.3        | 1.1        | NA<br>*** |
| <i>ECB_00528</i> | Polypeptide: orf                                                                                        | 571,188 – 571,448 | Deletion | 1.0         | -0.1       | NA<br>*** |
| <i>ECB_00529</i> | Polypeptide: orf                                                                                        | 571,481 – 572,038 | Deletion | 0.5         | 0.2        | NA<br>*** |
| <i>ECB_00530</i> | Polypeptide: orf                                                                                        | 571,890 – 573,488 | Deletion | -0.0        | 0.9        | NA<br>*** |
| <i>cusS</i>      | Polypeptide: CusS sensory histidine kinase                                                              | 574,225 – 575,673 | Deletion | 0.5<br>*    | 0.0        | NA<br>*** |
| <i>cusR</i>      | Polypeptide: CusR                                                                                       | 575,663 – 576,346 | Deletion | 0.5<br>**   | -0.4       | NA<br>*** |
| <i>cusC</i>      | Polypeptide: copper / silver efflux transport system – outer membrane porin                             | 576,503 – 577,876 | Deletion | 0.7<br>***  | -0.4       | NA<br>*** |
| <i>ylcC</i>      | Polypeptide: copper / silver efflux transport system – periplasmic binding protein and metallochaperone | 578,034 – 578,366 | Deletion | 0.6<br>**   | 0.0        | NA<br>*** |
| <i>cusB</i>      | Polypeptide: copper / silver efflux system – membrane fusion protein                                    | 578,382 – 579,605 | Deletion | 0.6<br>***  | -0.2       | NA<br>*** |
| <i>cusA</i>      | Polypeptide: copper / silver efflux transport system – membrane subunit                                 | 579,617 – 582,760 | Deletion | 0.4<br>*    | -0.1       | NA<br>*** |

|               |                                                                                    |                   |          |                    |                    |                  |
|---------------|------------------------------------------------------------------------------------|-------------------|----------|--------------------|--------------------|------------------|
| <i>pheP</i>   | Transporter: phenylalanine: H <sup>+</sup> symporter PheP                          | 582,862 – 584,238 | Deletion | <b>-0.9</b><br>*** | 0.0                | <b>NA</b><br>*** |
| <i>ybdG</i>   | Polypeptide: mechanosensitive channel of miniconductance YbdG monomer              | 584,306 – 585,553 | Deletion | <b>-1.4</b><br>*** | 0.5                | <b>NA</b><br>*** |
| <i>nfnB</i>   | Enzyme: NfsB monomer                                                               | 585,661 – 586,314 | Deletion | <b>-2.0</b><br>*** | 0.8<br>*           | <b>NA</b><br>*** |
| <i>ybdF</i>   | Polypeptide: conserved protein                                                     | 586,408 – 586,776 | Deletion | 0.2                | 0.0                | <b>NA</b><br>*** |
| <i>ybdJ</i>   | Polypeptide: predicted inner membrane protein                                      | 586,841 – 587,089 | Deletion | 0.2                | -0.3               | <b>NA</b><br>*** |
| <i>ybdK</i>   | Polypeptide: carboxylate-amine ligase                                              | 587,155 – 588,273 | Deletion | <b>3.7</b><br>***  | <b>-1.5</b><br>*** | <b>NA</b><br>*** |
| <i>insB-7</i> | Polypeptide: IS1 protein InsB                                                      | 589,570 – 590,073 | Deletion | 0.4                | 0.2                | <b>NA</b><br>*** |
| <i>insA-7</i> | Polypeptide: IS1 protein InsA                                                      | 589,992 – 590,267 | Deletion | 0.1                | 0.0                | <b>NA</b><br>*** |
| <i>hokE</i>   | Polypeptide: HokE                                                                  | 590,543 – 590,695 | Deletion | 1.1<br>*           | -0.5               | <b>NA</b><br>*** |
| <i>insL-2</i> | Polypeptide: IS186/IS421 transposase                                               | 590,772 – 591,884 | Deletion | -0.1               | 0.8                | <b>NA</b><br>*** |
| <i>entD</i>   | Enzyme: phosphopantetheinyl transferase                                            | 592,166 – 592,795 | Deletion | -0.2               | 0.6                | <b>NA</b><br>*** |
| <i>fepA</i>   | Polypeptide: ferric enterobactin / colicin B / colicin D outer membrane porin FepA | 592,961 – 595,201 | Deletion | <b>-0.8</b><br>*** | 1.0<br>*           | <b>NA</b><br>*** |
| <i>fes</i>    | Enzyme: enterochelin esterase                                                      | 595,523 – 596,647 | Deletion | 0.9                | 0.0                | <b>NA</b><br>*** |
| <i>ybdZ</i>   | Polypeptide: MbtH-like protein that enhances the catalytic function of EntF        | 596,650 – 596,868 | Deletion | 0.8                | 0.2                | <b>NA</b><br>*** |
| <i>entF</i>   | Polypeptide: apo-serine activating enzyme                                          | 596,865 – 600,746 | Deletion | 0.7<br>*           | 0.1                | <b>NA</b><br>*** |
| <i>fepE</i>   | Polypeptide: ferric enterobactin (enterochelin) transport                          | 600,962 – 602,095 | Deletion | 0.3                | -0.2               | <b>NA</b><br>*** |
| <i>fepC</i>   | Polypeptide: ferric enterobactin ABC transporter – ATP binding subunit             | 602,092 – 602,907 | Deletion | <b>-0.7</b><br>*** | 0.5                | <b>NA</b><br>*** |
| <i>fepG</i>   | Polypeptide: ferric enterobactin ABC transporter – membrane subunit                | 602,904 – 603,896 | Deletion | <b>-0.7</b><br>*** | 0.3                | <b>NA</b><br>*** |

|                                |                  |                                                                                |                   |                         |             |            |            |
|--------------------------------|------------------|--------------------------------------------------------------------------------|-------------------|-------------------------|-------------|------------|------------|
|                                | <i>fepD</i>      | Polypeptide: ferric enterobactin ABC transporter – membrane subunit            | 603,893 – 604,897 | Deletion                | -0.7<br>**  | 0.2        | NA<br>***  |
|                                | <i>ybdA</i>      | Transporter: enterobactin efflux transporter EntS                              | 605,008 – 606,258 | Deletion                | -2.0<br>*** | 1.3<br>*** | NA<br>***  |
|                                | <i>fepB</i>      | Polypeptide: ferric enterobactin ABC transporter – periplasmic binding protein | 606,262 – 607,218 | Deletion                | -0.5        | 0.7        | NA<br>***  |
|                                | <i>entC</i>      | Enzyme: isochorismate synthase 1                                               | 607,593 – 608,768 | Deletion                | 0.0         | 1.1        | NA<br>***  |
|                                | <i>entE</i>      | Enzyme: EntE                                                                   | 608,778 – 610,388 | Deletion                | 0.4         | 0.8        | NA<br>***  |
|                                | <i>entB</i>      | Polypeptide: EntB monomer                                                      | 610,402 – 611,259 | Deletion                | 0.6<br>*    | 0.7        | NA<br>***  |
|                                | <i>entA</i>      | Enzyme: EntA                                                                   | 611,259 – 612,005 | Deletion                | 0.7<br>**   | 0.6        | NA<br>***  |
|                                | <i>ybdB</i>      | Enzyme: proofreading thioesterase in enterobactin biosynthesis                 | 612,008 – 612,421 | Deletion                | 0.5         | 0.5        | NA<br>***  |
|                                | <i>ybdD</i>      | Polypeptide: conserved protein                                                 | 614,879 – 615,076 | Deletion                | 1.6<br>***  | -1.0       | NA<br>***  |
|                                | <i>ybdH</i>      | Polypeptide: predicted oxidoreductase                                          | 615,086 – 616,174 | Deletion                | -0.8<br>*** | -0.6       | NA<br>***  |
|                                | <i>ybdL</i>      | Enzyme: methionine-oxo-acid transaminase, PLP-dependent                        | 616,283 – 617,443 | Deletion                | -2.1<br>*** | 0.3        | NA<br>***  |
|                                | <i>ybdM</i>      | Polypeptide: conserved protein                                                 | 617,444 – 618,073 | Deletion                | -0.4        | -0.1       | NA<br>***  |
|                                | <i>ybdN</i>      | Polypeptide: orf                                                               | 618,046 – 619,107 | Deletion                | -0.1        | 0.1        | NA<br>***  |
| Point mutation<br><i>E271G</i> | <i>mrdB</i>      | Polypeptide: rod shape-determining membrane protein                            | 648086            | Amino acid substitution | -0.7<br>**  | 0.3        | 0.9<br>**  |
| Point mutation<br><i>H30R</i>  | <i>ydaE</i>      | Polypeptide: Rac prophage; zinc-binding protein                                | 1,415,090         | Amino acid substitution | -0.0        | 1.3        | NA<br>***  |
| Point mutation<br><i>A35E</i>  | <i>ECB_02828</i> | Transporter: Polysialic acid transporter protein kpsM                          | 3,028,366         | Amino acid substitution | -1.4<br>*** | 0.6        | 0.9<br>**  |
| Point mutation<br><i>D2E</i>   | <i>glpE</i>      | Enzyme: thiosulfate sulfurtransferase                                          | 3,490,427         | Amino acid substitution | -0.7<br>*** | 0.7        | 1.8<br>*** |
| Point mutation<br><i>I572L</i> | <i>rpoB</i>      | Enzyme: DNA-directed RNA polymerase subunit beta                               | 4,162,571         | Amino acid substitution | -1.5<br>*** | 0.4        | 1.4<br>*** |

<sup>1</sup> Position relative to the genome of *E.coli* B REL606

<sup>2</sup> The logarithm (to basis 2) of the fold change. The asterisks represent the significance ( $q$ ), with one asterisk denoting significance at  $q < 0.05$ , two asterisks denoting significance at  $0.001 < q < 0.01$ , and three asterisks denoting significance at  $q < 0.001$ . Bold values represent a significant differentiation of genes with red values representing up-regulation of genes and blue values representing down-regulation of genes.

**Table S6.** Mutations and gene expression changes of the high temperature adapted clone 97.

| Mutational event     | Gene             | Product                                             | Position <sup>1</sup> | Genetic effect          | log2fold change <sup>2</sup> |                    |                    |
|----------------------|------------------|-----------------------------------------------------|-----------------------|-------------------------|------------------------------|--------------------|--------------------|
|                      |                  |                                                     |                       |                         | A37 vs A42                   | A42 vs I572L       | A42 vs c97         |
| IS Insertion IS1     | <i>ykgE</i>      | Polypeptide: predicted oxidoreductase               | 294,445               | Inactivation?           | 0.7<br>*                     | <b>-1.4</b><br>*** | <b>-1.1</b><br>*** |
| Point mutation Q526P | <i>dnaX</i>      | Enzyme: DNA polymerase III subunits gamma and tau   | 465,735               | Amino acid substitution | <b>-1.1</b><br>***           | <b>1.1</b><br>***  | <b>1.3</b><br>***  |
| Point mutation V461G | <i>ybaL</i>      | Polypeptide: YbaL CPA2 transporter                  | 473,924               | Amino acid substitution | -0.2                         | -0.1               | 0.2                |
| Point mutation R69H  | <i>mrdB</i>      | Polypeptide: rod shape-determining membrane protein | 648,692               | Amino acid substitution | -0.7<br>**                   | 0.6                | 0.8<br>**          |
| Point mutation D96N  | <i>dinG</i>      | Polypeptide: ATP-dependent helicase                 | 825,980               | Amino acid substitution | 0.2                          | -0.2               | -0.1               |
| Deletion of 4 bp     | <i>glpT</i>      | Transporter: glycerol-3-phosphate antiporter        | 2,298,766             | Inactivation?           | <b>1.4</b><br>***            | -1.6<br>**         | <b>-3.0</b><br>*** |
| Point mutation L30Q  | <i>ECB_02828</i> | Transporter: Polysialic acid transport protein kpsM | 3,028,381             | Amino acid substitution | <b>-1.4</b><br>***           | <b>2.2</b><br>***  | <b>1.0</b><br>***  |
| Point mutation I572L | <i>rpoB</i>      | Enzyme: DNA-directed RNA polymerase subunit beta    | 4,162,571             | Amino acid substitution | <b>-1.5</b><br>***           | 0.9                | <b>1.5</b><br>***  |
| Point mutation A45V  | <i>iclR</i>      | Polypeptide: IclR transcriptional repressor         | 4,202,435             | Amino acid substitution | -0.3                         | 0.1                | <b>3.3</b><br>***  |

<sup>1</sup> Position relative to the genome of *E.coli* B REL606

<sup>2</sup> The logarithm (to basis 2) of the fold change. The asterisks represent the significance ( $q$ ), with one asterisk denoting significance at  $q < 0.05$ , two asterisks denoting significance at  $0.001 < q < 0.01$ , and three asterisks denoting significance at  $q < 0.001$ . Bold values represent a significant differentiation of genes with red values representing up-regulation of genes and blue values representing down-regulation of genes.

**Table S7.** Estimation of the lag phase by interpolating the growth rate for the high-temperature adapted clones 27 and 97 at 42°C compared to the mutant *I572L* and the ancestor at 37°C and 42°C (values in table 1).

| Strain                     | $\tau$ <sup>1</sup>       |
|----------------------------|---------------------------|
| 27                         | 0.7 (0.2)                 |
| 97                         | 1.1 (0.3)                 |
| Comparison                 | Significance <sup>2</sup> |
| 27 vs ancestor at 42°C     | 0.632                     |
| 97 vs ancestor at 42°C     | 0.949                     |
| 27 vs <i>I572L</i> at 42°C | 0.109                     |
| 97 vs <i>I572L</i> at 42°C | 0.165                     |
| 27 vs ancestor at 37°C     | 0.093                     |
| 97 vs ancestor at 37°C     | 0.083                     |

<sup>1</sup> Duration of the effective lag phase with standard error in parenthesis.

<sup>2</sup> Significance value from a two-sample t-test. The null hypothesis is that the means are equal.

**Table S8.** Gene expression changes of the flagellum genes.

| Gene        | Products/putative cellular functions                   | log <sub>2</sub> fold change Anc@42 vs Anc@37 <sup>1</sup> | log <sub>2</sub> fold change <i>I572L</i> @42 vs Anc@42 | log <sub>2</sub> fold change c97@42 vs Anc@42 |
|-------------|--------------------------------------------------------|------------------------------------------------------------|---------------------------------------------------------|-----------------------------------------------|
| <i>flgA</i> | Flagellar biosynthesis; hook-filament junction protein | -5.4                                                       | 3.3                                                     | -0.8                                          |
| <i>flgB</i> | Flagellar basal-body rod protein FlgB                  | -6.8                                                       | 4.5                                                     | -0.9                                          |
| <i>flgC</i> | Flagellar basal-body rod protein FlgC                  | -7.4                                                       | 4.7                                                     | -0.9                                          |
| <i>flgD</i> | Flagellar biosynthesis                                 | -7.2                                                       | 4.3                                                     | -1.0                                          |
| <i>flgE</i> | Flagellar hook protein FlgE                            | -7.3                                                       | 4.0                                                     | -1.1                                          |
| <i>flgF</i> | Flagellar basal-body rod protein FlgF                  | -7.2                                                       | 3.6                                                     | -1.2                                          |
| <i>flgG</i> | Flagellar basal-body rod protein FlgG                  | -7.3                                                       | 3.5                                                     | -1.4                                          |
| <i>flgH</i> | Flagellar L-ring protein FlgH                          | -6.9                                                       | 3.3                                                     | -1.5                                          |
| <i>flgI</i> | Flagellar P-ring protein FlgI                          | -6.3                                                       | 2.5                                                     | -1.3                                          |
| <i>flgJ</i> | Flagellar protein FlgJ                                 | -5.7                                                       | 2.1                                                     | -1.3                                          |
| <i>flgK</i> | Flagellar biosynthesis; hook-filament junction protein | -4.8                                                       | 1.1                                                     | -1.0                                          |
| <i>flgL</i> | Flagellar biosynthesis; hook-filament junction protein | -3.9                                                       | 0.3                                                     | -1.0                                          |
| <i>flgN</i> | Flagellar biosynthesis protein FlgN                    | -3.8                                                       | 1.8                                                     | -0.6                                          |

|             |                                     |      |     |      |
|-------------|-------------------------------------|------|-----|------|
| <i>flhA</i> | Flagellar biosynthesis protein FlhA | -5.6 | 2.6 | -0.9 |
| <i>flhB</i> | Flagellar biosynthesis protein FlhB | -6.2 | 3.4 | -1.1 |
| <i>flhE</i> | Flagellar protein                   | -6.6 | 3.2 | -1.1 |

**Table S9.** RNAseq libraries' read counts.

| Strain           | Library | Total Reads | Unique Map Reads | To coding DNA sequences (CDS) |
|------------------|---------|-------------|------------------|-------------------------------|
| Ancestor at 37°C | Anc37_1 | 61,887,699  | 58,604,582 (95%) | 51,434,341 (88%)              |
|                  | Anc37_2 | 58,303,507  | 54,387,815 (93%) | 47,723,224 (88%)              |
|                  | Anc37_3 | 55,074,809  | 52,130,655 (95%) | 45,809,395 (88%)              |
| Ancestor at 42°C | Anc42_1 | 69,151,100  | 59,635,514 (86%) | 49,234,852 (83%)              |
|                  | Anc42_2 | 69,013,539  | 25,551,283 (37%) | 20,379,870 (80%)              |
| <i>I572F</i>     | I572F_1 | 46,551,706  | 44,869,857 (96%) | 39,268,167 (86%)              |
|                  | I572F_2 | 44,953,035  | 42,756,199 (95%) | 37,243,643 (87%)              |
| <i>I572L</i>     | I572L_1 | 58,193,448  | 55,309,904 (95%) | 48,045,329 (87%)              |
|                  | I572L_2 | 29,751,293  | 27,853,863 (94%) | 23,711,602 (85%)              |
| <i>I572N</i>     | I572N_1 | 17,203,921  | 16,373,928 (95%) | 14,110,467 (86%)              |
|                  | I572N_2 | 19,905,024  | 18,403,051 (92%) | 15,872,019 (86%)              |
| <i>I966S</i>     | I966S_1 | 46,037,970  | 44,039,452 (96%) | 38,586,863 (88%)              |
|                  | I966S_2 | 43,613,720  | 41,586,753 (95%) | 36,333,792 (87%)              |
| 27               | 27_1    | 33,865,380  | 27,564,479 (81%) | 26,970,464 (98%)              |
|                  | 27_2    | 28,775,192  | 26,937,439 (94%) | 23,722,802 (88%)              |
| 97               | 97_1    | 46,683,449  | 44,373,456 (95%) | 38,866,962 (88%)              |
|                  | 97_2    | 28,525,253  | 26,787,880 (94%) | 23,179,619 (87%)              |



**Table S10.** Primers used in this study.

| <b>Name</b> | <b>Function</b>                                                               | <b>Sequence</b>                |
|-------------|-------------------------------------------------------------------------------|--------------------------------|
| ARV19       | Amplify the CAT:tetR:YFP genomic cassette (forward primer)                    | 5'- CGAAACATCCGGCAATAGAT -3'   |
| ARV20       | Amplify the CAT:tetR:YFP genomic cassette (reverse primer)                    | 5'- CCAAAGCGACTTTTTTCAGC -3'   |
| ARV34       | External verification primer (forward primer)                                 | 5'- AACGCAACTGGAAACAGAGG -3'   |
| ARV35       | External verification primer (reverse primer)                                 | 5'- TGCCGGTAATACCCTGAAAC -3'   |
| ARV48       | Amplify the 117 bp fragment of the <i>gst</i> reference gene (forward primer) | 5'- CTGAAGGATGAGCACTGGATC -3'  |
| ARV49       | Amplify the 117 bp fragment of the <i>gst</i> reference gene (reverse primer) | 5'- AATGTGCTCTAACCCCTCCAG -3'  |
| ARV50       | Amplify the 120 bp fragment of the YFP target gene (forward primer)           | 5'- TGTGCTTTGCTAGATACCCAG -3'  |
| ARV51       | Amplify the 120 bp fragment of the YFP target gene (reverse primer)           | 5'- GTGTCTTGTAGTTCCCGTCATC -3' |
